# Supplementary material for: Oral Argumentation Skills between Process and Product
Source: MDPI journal article supplement (doi:10.3390/languages7020139), 2022-05-30
Supplement: s1 [file s1]

[1]

|          | 0 [00:00.0] | 1 [00:00.0]               | 2 [00:00.5] | 3 [00:01.0]          | 4 [00:02.3]                        |
|----------|-------------|---------------------------|-------------|----------------------|------------------------------------|
| SVE [v]  |             |                           | aso         | ich glaub ich WÄISS  | wa mer drIngend müend usenÄÄ;      |
| SVE [sd] |             |                           | also        | ich glaube ich weiss | was wir dringend rausnehmen müssen |
| SVE [a]  |             |                           | 1-für       | 2a-leu               |                                    |
| CEC [v]  |             | was SÄge mEr?             |             |                      |                                    |
| CEC [sd] |             | was sagen wir             |             |                      |                                    |
| CEC [nv] |             | ((schaut zu LAR und BJÖ)) |             |                      |                                    |
| CEC [a]  |             | 4-frage 4-meta            |             |                      |                                    |
| BJÖ [v]  |             |                           |             |                      | JA: ich wÜr (das);                 |
| BJÖ [sd] |             |                           |             |                      | ja ich würde (das)                 |
| BJÖ [nv] |             |                           |             |                      | ((zeigt auf das Zelt))             |
| BJÖ [a]  |             |                           |             |                      | 1-für 2a-zel 4-nonverbal           |
| [k]      | Instruktion |                           |             |                      |                                    |

[2]

|          | 5 [00:03.6]                     | 6 [00:03.9*]                      | 7 [00:04.4] | 8 [00:05.2] | 9 [00:05.4]                              | 10 [00:06.6] | 11 [00:07.2] |
|----------|---------------------------------|-----------------------------------|-------------|-------------|------------------------------------------|--------------|--------------|
| SVE [v]  | s FÜÜRwerch.                    |                                   |             |             | dOch s FÜÜRwerch.                        |              |              |
| SVE [sd] | das Feuerwerk                   |                                   |             |             | doch das Feuerwerk                       |              |              |
| SVE [nv] | ((zeigt auf die Leuchtraketen)) |                                   |             |             | ((tippt mehrmals auf die Leuchtraketen)) |              |              |
| SVE [a]  |                                 |                                   |             |             | 1-für 2a-leu                             |              |              |
| CEC [v]  | s ZÄLT.                         | NÄ:-                              |             |             |                                          |              |              |
| CEC [sd] | das Zelt                        | nein                              |             |             |                                          |              |              |
| CEC [nv] | ((zeigt auf das Zelt))          |                                   |             |             |                                          |              |              |
| CEC [a]  | 1-th 2a-zel                     |                                   |             |             |                                          |              |              |
| BJÖ [v]  |                                 | nÄi (.) wä lueg Ich ZÄIG dir mol; |             |             |                                          | es           |              |
| BJÖ [sd] |                                 | nein wä schau ich zeig dir mal    |             |             |                                          | ein Zelt     |              |
| BJÖ [nv] |                                 |                                   |             |             |                                          | ((tippt      |              |
| BJÖ [a]  |                                 | 1-für 2a-zel                      |             |             |                                          |              |              |

[3]

|          | 12 [00:08.5]                       | 13 [00:08.6]                         | 14 [00:10.3] | 15 [00:12.5] |
|----------|------------------------------------|--------------------------------------|--------------|--------------|
| SVE [v]  |                                    | Aber ES (.) me wäiss jo nId öb, (--) |              |              |
| SVE [sd] |                                    | aber es man weiss ja nicht ob        |              | wollen       |
| SVE [nv] |                                    |                                      |              | ((zeigt auf  |
| SVE [a]  |                                    |                                      |              | 2a-zel 2a-   |
| CEC [v]  | denn chÖmmer SCHLA (.) denn chönd- |                                      |              |              |
| CEC [sd] | dann können wir schla dann können  |                                      |              |              |
| CEC [a]  | 2a-zel 3a-zu 3b-kond 4-koko        |                                      |              |              |
| BJÖ [v]  | ZÄLT de hEmmer;                    |                                      |              |              |
| BJÖ [sd] | dann haben wir                     |                                      |              |              |
| BJÖ [nv] | mehrmals auf das Zelt))            |                                      |              |              |
| BJÖ [a]  |                                    |                                      |              |              |

[4]

|                 | 16 [00:13.9]                                 | 17 [00:14.8]18 [00:15.3]                               |
|-----------------|----------------------------------------------|--------------------------------------------------------|
| <b>SVE [v]</b>  | wEmmer (-) DIE drüü.                         |                                                        |
| <b>SVE [sd]</b> | wir diese drei                               |                                                        |
| <b>SVE [nv]</b> | <i>Zelt, Moskitonetz und Leuchtraketen))</i> |                                                        |
| <b>SVE [a]</b>  | mos 2a-leu 4-nonverbal 4-meta 4-frage        |                                                        |
| <b>BJÖ [v]</b>  | °h JA:-                                      | °h nÄi lug (.) wäisch DAS isch guet wenn es            |
| <b>BJÖ [sd]</b> | ja                                           | nein schau weisst du das ist gut wenn ein Schiff kommt |
| <b>BJÖ [nv]</b> |                                              | <i>((zeigt auf die Leuchtraketen))</i>                 |
| <b>BJÖ [a]</b>  |                                              | 1-für 2a-leu 3a-in 3b-kond 4-nonverbal                 |

[5]

|                 | 19 [00:19.0]                                                | 20 [00:20.9]                       |
|-----------------|-------------------------------------------------------------|------------------------------------|
| <b>BJÖ [v]</b>  | schliff chunnt, es ANDers do cha me (mit) Ufe tue,          | de wÜsseds Ah det ISCH             |
| <b>BJÖ [sd]</b> | ein anderes da kann man (mit) hoch tun                      | dann wissen sie ah dort ist jemand |
| <b>BJÖ [nv]</b> | <i>((streckt Zeigefinger der rechten Hand in die Höhe))</i> |                                    |
| <b>BJÖ [a]</b>  |                                                             |                                    |

[6]

|                 | 21 [00:22.8]                                                      | 22 [00:24.8]23 [00:25.3]                 | 24 [00:25.9]25 [00:28.5] |
|-----------------|-------------------------------------------------------------------|------------------------------------------|--------------------------|
| <b>SVE [v]</b>  |                                                                   | nÄi HENdi (nöd).                         |                          |
| <b>SVE [sd]</b> |                                                                   | nein Handy (nicht)                       |                          |
| <b>SVE [a]</b>  |                                                                   | 1-geg 2a-han 4-koko                      |                          |
| <b>CEC [v]</b>  |                                                                   |                                          | Aber                     |
| <b>CEC [sd]</b> |                                                                   |                                          | aber                     |
| <b>CEC [a]</b>  |                                                                   |                                          | 4-meta 4-                |
| <b>BJÖ [v]</b>  | Öpper? (.) odEr s HEN mh nä, DAS vilicht äh wemmer verlEtzt sind? |                                          |                          |
| <b>BJÖ [sd]</b> | oder das Han hm nee                                               | das vielleicht äh wenn wir verletzt sind |                          |
| <b>BJÖ [nv]</b> | <i>((zeigt auf das Handy))</i>                                    | <i>((zeigt auf das Verbandszeug))</i>    |                          |
| <b>BJÖ [a]</b>  | 1-geg 2a-han                                                      | 1-th 2a-ver 3a-in 3b-kond 4-nonverbal    |                          |

[7]

|                 | 26 [00:29.6]                              | 27 [00:30.5]28 [00:31.3]               | 29 [00:33.1]                      |
|-----------------|-------------------------------------------|----------------------------------------|-----------------------------------|
| <b>CEC [v]</b>  | mümmmer jetz nUme DRÜÜ sAchen Usholä?     |                                        |                                   |
| <b>CEC [sd]</b> | müssen wir jetzt nur drei Dinge rausholen |                                        |                                   |
| <b>CEC [a]</b>  | frage                                     |                                        |                                   |
| <b>LAR [v]</b>  |                                           |                                        | ja DAS dAs                        |
| <b>LAR [sd]</b> |                                           |                                        | ja das das und das oder           |
| <b>LAR [nv]</b> |                                           |                                        | <i>((zeigt auf Leuchtraketen,</i> |
| <b>LAR [a]</b>  |                                           |                                        | 1-für 2a-leu 1-für 2a-ver 1       |
| <b>BJÖ [v]</b>  | WÄISCH (wemme),                           | jA Ebe °h bim: äh da LUG lug lug-      |                                   |
| <b>BJÖ [sd]</b> | weisst du (wenn man)                      | ja eben bin ähm da schau schau schau   |                                   |
| <b>BJÖ [nv]</b> |                                           | <i>((hebt den Finger in die Luft))</i> |                                   |
| <b>BJÖ [a]</b>  |                                           | 4-meta                                 |                                   |

[8]

|          | 30 [00:35.0]                                                      | 31 [00:35.3*]32 [00:36.1]                        |
|----------|-------------------------------------------------------------------|--------------------------------------------------|
| CEC [v]  |                                                                   | NÄI. mosKItonetz bruuche mer ja nÖd              |
| CEC [sd] |                                                                   | nein Moskitonetz brauchen wir ja nicht unbedingt |
| CEC [a]  |                                                                   | 1-geg 2a-mos 2a-zel 3a-ab 3b-kaus 4-nonverbal    |
| LAR [v]  | <<leise> und das (-) oder dAs>.                                   |                                                  |
| LAR [sd] | das                                                               |                                                  |
| LAR [nv] | <i>Verbandszeug und Moskitonetz und danach noch auf das Zelt)</i> |                                                  |
| LAR [a]  | -für 2a-mos 1-für 2a-zel 4-nonverbal 4-meta                       |                                                  |

[9]

|          | 33 [00:38.6]34 [00:40.1]                             | 35 [00:40.8]                                  | 36 [00:41.2]           | 37 [00:42.7] |
|----------|------------------------------------------------------|-----------------------------------------------|------------------------|--------------|
| CEC [v]  | umbedingt. °h wIll das (chönnt) ja AU (1.7) schÜtze; |                                               |                        |              |
| CEC [sd] | weil das (könnte) ja auch schützen                   |                                               |                        |              |
| CEC [nv] | <i>((zeigt auf das Zelt und schaut zu LAR))</i>      |                                               |                        |              |
| CEC [a]  |                                                      |                                               |                        |              |
| BJÖ [v]  | hEi LUG?                                             | ähm mIr CHÖNNtet jO; (-)                      | Ähm wäisch (-          |              |
| BJÖ [sd] | hei schau                                            | ähm wir könnten ja                            | ähm weisst du das      |              |
| BJÖ [nv] |                                                      | <i>((steht auf))</i>                          | <i>((zeigt auf die</i> |              |
| BJÖ [a]  | 4-meta                                               | 1-th 2a-leu 1-geg 2a-feu 3a-in 3a-mehrfach 4- |                        |              |

[10]

|          | 38 [00:45.2]           | 39 [00:48.6]                                                      |
|----------|------------------------|-------------------------------------------------------------------|
| BJÖ [v]  | ) DAS?                 | (-) aber wemmer das wEnd (--) AAzünde. de mümmer lUege wie mer    |
| BJÖ [sd] |                        | aber wenn wir das anzünden wollen dann müssen wir schauen wie wir |
| BJÖ [nv] | <i>Leuchtraketen))</i> | <i>((zeigt mit einem zweiten Finger auf das</i>                   |
| BJÖ [a]  | nonverbal              |                                                                   |

[11]

|          | 40 [00:50.2]41 [00:50.7] | 42 [00:51.7]43 [00:51.8]44 [00:52.4]45 [00:53.1]       |
|----------|--------------------------|--------------------------------------------------------|
| SVE [v]  |                          | jA mit                                                 |
| SVE [sd] |                          | ja mit                                                 |
| SVE [a]  |                          | 2a-feu                                                 |
| CEC [v]  |                          | NÄ::I;                                                 |
| CEC [sd] |                          | nein                                                   |
| LAR [v]  | JA:.                     |                                                        |
| LAR [sd] | ja                       |                                                        |
| BJÖ [v]  | FÜÜret,                  | ah NÄI brUUche mer nÖd, mer chÖnne mit de STÄcke;      |
| BJÖ [sd] | feuern                   | ah nein brauchen wir nicht man kann ja mit den Stecken |
| BJÖ [nv] | <i>Feuerzeug))</i>       | <i>((reibt seine beiden Handflächen aneinander))</i>   |
| BJÖ [a]  |                          |                                                        |
| [nv]     | (-)                      |                                                        |

[12]

| .. 47 [00:53.2]48 [00:54.7]49 [00:56.1] |                                                            | 50 [00:58.2]       |
|-----------------------------------------|------------------------------------------------------------|--------------------|
| <b>SVE [v]</b>                          | STecke goots au.                                           | ähm DAS            |
| <b>SVE [sd]</b>                         | Stecken geht es auch                                       | ähm das würde ich  |
| <b>SVE [nv]</b>                         |                                                            | ((zeigt auf die    |
| <b>SVE [a]</b>                          | 3a-zu                                                      | 1-für 2a-leu 1-für |
| <b>CEC [v]</b>                          | Aber für wAs bruuche mir DAS.                              |                    |
| <b>CEC [sd]</b>                         | aber wozu brauchen wir das                                 |                    |
| <b>CEC [nv]</b>                         | ((deutet mit der offenen Hand in Richtung Leuchtraketen))  |                    |
| <b>CEC [a]</b>                          | 1-th 2a-leu 4-frage 4-nonverbal                            |                    |
| <b>BJÖ [v]</b>                          | nAcher (.) DAS und villich (-) villicht (.) DA:S?          |                    |
| <b>BJÖ [sd]</b>                         | danach das und vielleicht vielleicht das                   |                    |
| <b>BJÖ [nv]</b>                         | ((zeigt auf Leuchtraketen und dann noch auf Verbandszeug)) |                    |
| <b>BJÖ [a]</b>                          | 2a-leu 2a-ver 4-nonverbal                                  |                    |

[13]

| .. 52 [01:00.3] |                                                                  | 53 [01:02.2]54 [01:03.4] |
|-----------------|------------------------------------------------------------------|--------------------------|
| <b>SVE [v]</b>  | würd ich nÄÄ und dAs und äh und s s zÜÜg.                        |                          |
| <b>SVE [sd]</b> | nehmen und das und äh und das das Zeug                           |                          |
| <b>SVE [nv]</b> | Leuchtraketen, das Zelt und das Verbandszeug))                   |                          |
| <b>SVE [a]</b>  | 2a-zel 1-für 2a-ver 4-meta 4-nonverbal                           |                          |
| <b>BJÖ [v]</b>  | dAs wIll (.) wemmer igendwIe DORne het, und mIr münd DURE; de    |                          |
| <b>BJÖ [sd]</b> | das weil wenn man irgendwie Dornen hat und wir müssen durch dann |                          |
| <b>BJÖ [a]</b>  | 1-für 2a-ver 3a-zu 3b-kaus 3b-kond 4-koko                        |                          |

[14]

| .. 56 [01:05.2] |                                                                | 57 [01:06.6]58 [01:07.7]        |
|-----------------|----------------------------------------------------------------|---------------------------------|
| <b>CEC [v]</b>  | denn hAlt DIE-                                                 | °h oder wÄisch (.) mIr          |
| <b>CEC [sd]</b> | dann halt diese                                                | oder weisst du wir könnten      |
| <b>CEC [nv]</b> | ((zeigt auf das Zelt, die Leuchtraketen und das Verbandszeug)) | ((zeigt auf die Leuchtraketen)) |
| <b>CEC [a]</b>  | 1-th 2a-zel 1-th 2a-leu 1-th 2a-ver 4-meta 4-nonverbal         | 1-th 2a-leu 3a-in 3b-kond 3b-   |
| <b>BJÖ [v]</b>  | CHÖMmer (.) wEmmer verlEtzt <<leise> sind>.                    |                                 |
| <b>BJÖ [sd]</b> | können wir wenn wir verletzt sind                              |                                 |
| <b>BJÖ [a]</b>  |                                                                |                                 |
| <b>[nv]</b>     |                                                                | (1.0)                           |

[15]

|          | 59 [01:09.8]                                                  | 60 [01:11.7]                                  |
|----------|---------------------------------------------------------------|-----------------------------------------------|
| CEC [v]  | chÖntet au DIE mÄche; WENNS wenn °h wEnn:- dAss die Andere üs |                                               |
| CEC [sd] | auch diese machen                                             | wenn es wenn wenn damit die anderen uns sehen |
| CEC [nv] |                                                               |                                               |
| CEC [a]  | fin 4-nonverbal                                               |                                               |

[16]

|          | 61 [01:13.2]                              | 62 [01:14.4]                                              | 63 [01:15.0] | 64 [01:15.8] |
|----------|-------------------------------------------|-----------------------------------------------------------|--------------|--------------|
| CEC [v]  | GSEND äfach (alli Abeloo); okei DIE drÜÜ. |                                                           |              |              |
| CEC [sd] | einfach (alle ablassen)                   | okay diese drei                                           |              |              |
| CEC [nv] |                                           | ((zeigt wieder auf Zelt, Leuchtraketen und Verbandszeug)) |              |              |
| CEC [a]  |                                           | 1-th 2a-zel 1-th 2a-leu 1-th 2a-ver 4-meta 4-nonverbal    |              |              |
| BJÖ [v]  | ja Ebe DAS?                               | DAS?                                                      |              |              |
| BJÖ [sd] | ja eben das                               | das                                                       |              |              |
| BJÖ [nv] | ((zeigt auf die Leuchtraketen))           | ((schaut zu CEC und tippt erneut auf Leuchtraketen))      |              |              |
| BJÖ [a]  | 1-th 2a-leu                               | 1-th 2a-leu 4-meta 4-frage 4-nonverbal                    |              |              |
| [nv]     |                                           |                                                           |              | (---)        |

[17]

|          | 65 [01:16.6]                                                    | 66 [01:17.5] | 67 [01:18.4]                        | 68 [01:19.2] | 69 [01:19.9] |
|----------|-----------------------------------------------------------------|--------------|-------------------------------------|--------------|--------------|
| CEC [v]  | DIE drÜÜ.                                                       |              |                                     |              |              |
| CEC [sd] | diese drei                                                      |              |                                     |              |              |
| CEC [a]  | 1-th 2a-leu 1-th 2a-zel 1-th 2a-ver 4-meta                      |              |                                     |              |              |
| LAR [v]  |                                                                 |              | DAS;                                |              |              |
| LAR [sd] |                                                                 |              | das                                 |              |              |
| LAR [nv] | ((zeigt auf das Zelt))                                          |              | ((zeigt zusätzlich zum Zelt auf die |              |              |
| LAR [a]  | 2a-zel 4-nonverbal                                              |              | 1-th 2a-zel 1-th 2a-leu 1-th 2a-    |              |              |
| BJÖ [v]  | DAS (-) und dA:s und da:s;                                      |              |                                     |              |              |
| BJÖ [sd] | das und das und das                                             |              |                                     |              |              |
| BJÖ [nv] | ((zeigt zusätzlich zu Leuchtraketen auf Zelt und Verbandszeug)) |              |                                     |              |              |
| BJÖ [a]  | 1-th 2a-leu 1-th 2a-zel 1-th 2a-ver 4-meta 4-nonverbal          |              |                                     |              |              |

[18]

|          | 70 [01:20.6]                         | 71 [01:20.7] | 72 [01:21.1]                                                      |
|----------|--------------------------------------|--------------|-------------------------------------------------------------------|
| SVE [v]  |                                      |              | aber wämmer nIt s verbANDzüüg AU no                               |
| SVE [sd] |                                      |              | aber wollen wir nicht das Verbandszeug auch noch nehmen           |
| SVE [nv] |                                      |              | ((schaut bei CEC, LAR und BJÖ auf das Blatt))                     |
| SVE [a]  |                                      |              | 1-für 2a-ver 4-frage                                              |
| CEC [v]  | okEI.                                |              |                                                                   |
| CEC [sd] | okay                                 |              |                                                                   |
| LAR [v]  |                                      |              |                                                                   |
| LAR [sd] |                                      |              |                                                                   |
| LAR [nv] | Leuchtraketen und das Verbandszeug)) |              |                                                                   |
| LAR [a]  | ver 4-meta 4-nonverbal               |              |                                                                   |
| [nv]     |                                      |              | ((CEC, LAR und BJÖ zeigen noch immer mit jeweils drei Fingern auf |

[19]

| ..       |                             | 73 [01:23.1] | 74 [01:23.4] | 75 [01:24.0] | 76 [01:24.3] | 77 [01:24.6]              | 78 [01:26.4] |
|----------|-----------------------------|--------------|--------------|--------------|--------------|---------------------------|--------------|
| SVE [v]  | nÄÄ.                        |              |              | ah DOCH,     |              |                           |              |
| SVE [sd] |                             |              |              | ah doch      |              |                           |              |
| SVE [nv] |                             |              |              |              |              |                           |              |
| SVE [a]  |                             |              |              |              |              |                           |              |
| CEC [v]  |                             |              |              | Ebe.         |              | wEmmer jetzt              |              |
| CEC [sd] |                             |              |              | eben         |              | wollen wir jetzt schreien |              |
| CEC [a]  |                             |              |              |              |              | 4-meta 4-frage            |              |
| BJÖ [v]  |                             |              |              | (DO) dOch.   |              |                           |              |
| BJÖ [sd] |                             |              |              | (da/do) doch |              |                           |              |
| [nv]     | die gewählten Gegenstände)) |              |              |              |              | (1.7)                     |              |

[20]

| ..       |                 | 79 [01:28.1] | 80 [01:28.8]                                | 81 [01:29.8]                  | 82 [01:30.7] |
|----------|-----------------|--------------|---------------------------------------------|-------------------------------|--------------|
| CEC [v]  | SCHREle; hehe   |              |                                             |                               |              |
| CEC [sd] | hehe            |              |                                             |                               |              |
| CEC [a]  |                 |              |                                             |                               |              |
| LAR [v]  |                 |              |                                             | °hhh Aber (-) wie             |              |
| LAR [sd] |                 |              |                                             | aber wie zünden wir sie       |              |
| LAR [nv] |                 |              |                                             | ((hält Kopf schräg und schaut |              |
| LAR [a]  |                 |              |                                             | 2a-leu 3a-ab 4-frage          |              |
| BJÖ [v]  |                 |              | JETZT?                                      |                               |              |
| BJÖ [sd] |                 |              | jetzt                                       |                               |              |
| BJÖ [nv] |                 |              | ((nut, als ob er schreien würde und lacht)) |                               |              |
| BJÖ [a]  |                 |              | 4-meta 4-frage                              |                               |              |
| [nv]     | ((alle lachen)) |              |                                             |                               |              |

[21]

| ..       |                         | 83 [01:34.0] | 84 [01:35.1] | 85 [01:36.4] | 86 [01:37.5]                |
|----------|-------------------------|--------------|--------------|--------------|-----------------------------|
| SVE [v]  |                         |              |              | mIt STEcke.  |                             |
| SVE [sd] |                         |              |              | mit Stecken  |                             |
| SVE [a]  |                         |              |              | 2a-leu 3a-ab |                             |
| LAR [v]  | zÜndet mer sii denn AA. |              |              |              |                             |
| LAR [sd] | dann an                 |              |              |              |                             |
| LAR [nv] | BJÖ fragend an))        |              |              |              |                             |
| LAR [a]  |                         |              |              |              |                             |
| BJÖ [v]  |                         |              | ja (-) Ebe,  |              | wÄisch de chAsch SO         |
| BJÖ [sd] |                         |              | ja eben      |              | weisst du dann kannst du so |
| BJÖ [nv] |                         |              |              |              | ((reibt beide Handflächen   |
| BJÖ [a]  |                         |              |              |              | 2a-leu 3a-ab 4-nonverbal    |
| [nv]     |                         |              | (1.0)        |              |                             |

[22]

| ..       | 87 [01:37.9]88 [01:39.3]               | 89 [01:39.5]90 [01:40.3]                                    |
|----------|----------------------------------------|-------------------------------------------------------------|
| SVE [v]  | no chasch SO mit stEcke mAche,         | denn chunnts FÜÜR.                                          |
| SVE [sd] | dann kannst du so mit Stecken machen   | dann kommt das Feuer                                        |
| SVE [nv] | ((reibt beide Handflächen aneinander)) | ((hält beide Hände mit Handflächen nach                     |
| SVE [a]  | 2a-leu 3a-ab 4-nonverbal 4-rück 4-koko |                                                             |
| CEC [v]  |                                        | jA so TSCH (--) so                                          |
| CEC [sd] |                                        | ja so tsch so (xxxxxx)                                      |
| CEC [nv] |                                        | ((macht Fäuste und tut so, als ob                           |
| CEC [a]  |                                        | 2a-leu 3a-zu 4-nonverbal                                    |
| BJÖ [v]  | mache und nacher, nAcher mAchts FÜÜR.  |                                                             |
| BJÖ [sd] | machen und nachher                     | nachher macht es Feuer                                      |
| BJÖ [nv] | aneinander))                           | ((zeigt mit Zeigefinger nach unten und dreht ihn im Kreis)) |
| BJÖ [a]  |                                        |                                                             |

[23]

| ..       | 91 [01:40.7]92 [01:43.0]93 [01:43.3]       | 94 [01:44.8]95 [01:46.8] |
|----------|--------------------------------------------|--------------------------|
| SVE [v]  |                                            |                          |
| SVE [sd] |                                            |                          |
| SVE [nv] | unten vor sich))                           |                          |
| SVE [a]  |                                            |                          |
| CEC [v]  | <<flüsternd> (xxxxxx)>.                    | °h EHM wer hOlt s-       |
| CEC [sd] |                                            | ehm wer holt s           |
| CEC [nv] | sie zwei Stecken aneinander reiben würde)) | hh° schrEie              |
| CEC [a]  |                                            | schreien wir äh          |
| [nv]     | (-)                                        | (2.0)                    |

[24]

| ..       | 96 [01:49.2]                                                          | 97 [01:51.2] |
|----------|-----------------------------------------------------------------------|--------------|
| CEC [v]  | mer ÄH:?                                                              |              |
| CEC [sd] |                                                                       |              |
| CEC [a]  |                                                                       |              |
| BJÖ [v]  | IUg denn hän mer wider ((flüstert unverständlich, ca. 0.7 Sek.))      |              |
| BJÖ [sd] | schau dann haben wir wieder ((flüstert unverständlich, ca. 0.7 Sek.)) |              |
| [nv]     |                                                                       | ((alle       |

[25]

| ..       | 98 [01:54.8]99 [01:54.9]100 [01:55.4]      | 101 [01:56.1] |
|----------|--------------------------------------------|---------------|
| CEC [nv] | (( kichert))                               |               |
| LAR [v]  | ((unverständlich, ca. 1.2 Sek.))           |               |
| BJÖ [v]  | Oder mir chÖntet AU (---) hm-              |               |
| BJÖ [sd] | oder wir könnten auch hm                   |               |
| BJÖ [a]  | 4-meta                                     |               |
| [nv]     | schauen zu BJÖ und grinsen, ca. 3.6 Sek.)) |               |

[26]

| 102 [01:58.7] | 103 [02:01.3]                                               |
|---------------|-------------------------------------------------------------|
| SVE [v]       | aber was Isch wenns uf dEre INsle nit                       |
| SVE [sd]      | aber was ist wenn es auf dieser Insel nicht                 |
| SVE [a]       | 2a-leu 3a-ab 3b-kond 4-frage                                |
| [nv]          | ((unverständliches Gemurmel und Gekicher während 2.5 Sek.)) |

[27]

| ..       |                      | 104 [02:04.1]105 [02:05.4]            | 106 [02:07.4]107 [02:07.7] |
|----------|----------------------|---------------------------------------|----------------------------|
| SVE [v]  | grad vill HOLZ het?  |                                       | (dO) aber                  |
| SVE [sd] | gerade viel Holz hat |                                       | (da) aber wie              |
| SVE [a]  |                      |                                       | 2a-leu 3a-ab               |
| BJÖ [v]  |                      | MOL lug da hets ganz vill bÄum.       |                            |
| BJÖ [sd] |                      | doch schau da hat es ganz viele Bäume |                            |
| BJÖ [nv] |                      | ((zeigt auf das Inselbild))           |                            |
| BJÖ [a]  |                      | 2a-leu 3a-ab                          |                            |
| [nv]     | (1.3)                |                                       | (-)                        |

[28]

| ..       |                                            | 108 [02:09.9]                              | 109 [02:10.6]110 [02:11.6]   | 111 [02:12.4*] |
|----------|--------------------------------------------|--------------------------------------------|------------------------------|----------------|
| SVE [v]  | wie wotsch die ABbreche wenns dlck sind.   |                                            | mit DERE schEr; die sind zum |                |
| SVE [sd] | willst du die abbrechen wenn sie dick sind |                                            | mit dieser Schere            | die sind zum   |
| SVE [nv] |                                            |                                            |                              | ((imitiert das |
| SVE [a]  | 3b-kond 4-frage 4-quae                     |                                            | 2a-leu 2a-ver 3a-ab          |                |
| CEC [v]  |                                            | mit de SCHÄr, hehe                         |                              |                |
| CEC [sd] |                                            | mit der Schere                             |                              |                |
| CEC [nv] |                                            | ((zeigt auf die Schere beim Verbandszeug)) |                              |                |
| CEC [a]  |                                            | 2a-leu 3a-ab                               |                              |                |

[29]

| ..       |                                                           | 112 [02:13.2] | 113 [02:14.2]114 [02:15.1]115 [02:15.9]                       |
|----------|-----------------------------------------------------------|---------------|---------------------------------------------------------------|
| SVE [v]  | verBAND schnIide;                                         |               | AH, hh°                                                       |
| SVE [sd] | Verband schneiden                                         |               | ah                                                            |
| SVE [nv] | Schneiden eines Gegenstandes))                            |               | ((hält Hand an Kopf, atmet tief aus und schaut etwas ratlos)) |
| SVE [a]  |                                                           |               | 4-extra                                                       |
| CEC [v]  | <<lachend> ich WÄISS;> (.) WÄISCH mit dr schEr. ((lacht)) |               |                                                               |
| CEC [sd] | ich weiss                                                 |               | weisst du mit der Schere ((lacht))                            |
| CEC [a]  | 2a-leu 2a-ver 3a-ab                                       |               |                                                               |

[30]

| ..       |      | 116 [02:17.0]117 [02:17.7*]118 [02:18.4] | 119 [02:19.7] | 120 [02:19.9]121 [02:21.4]122 [02:21.6]123 [02:22.0] |
|----------|------|------------------------------------------|---------------|------------------------------------------------------|
| SVE [nv] |      |                                          |               | ((schaut auf LARs Blatt))                            |
| CEC [v]  |      | chame d RINde abchrAtze;                 |               | JA?                                                  |
| CEC [sd] |      | kann man die Rinde abkratzen             |               | ja                                                   |
| CEC [a]  |      | 2a-leu 3a-ab 4-rück                      |               |                                                      |
| LAR [v]  |      | dA hets no en MÄSser.                    |               |                                                      |
| LAR [sd] |      | da hat es noch ein Messer                |               |                                                      |
| LAR [nv] |      | ((zeigt auf das Buschmesser))            |               |                                                      |
| LAR [a]  |      | 1-th 2a-bus                              |               |                                                      |
| BJÖ [v]  |      | DA (.) vilicht,                          |               | °h Oder WÄISCH was                                   |
| BJÖ [sd] |      | da vielleicht                            |               | oder weisst du was könnten wir                       |
| BJÖ [a]  |      | 4-meta                                   |               | 4-meta 4-frage                                       |
| [nv]     | (--) |                                          |               |                                                      |



[31]

| ..       | 124 [02:23.6]125 [02:23.8]126 [02:23.9] | 127 [02:25.7]                                                     |
|----------|-----------------------------------------|-------------------------------------------------------------------|
| CEC [v]  | es SACKmÄsser.                          |                                                                   |
| CEC [sd] | ein Sackmesser                          |                                                                   |
| CEC [a]  | 1-th 2a-sac                             |                                                                   |
| BJÖ [v]  | chÖnte mer mÄche.                       | NÄI wäisch was BRUUche mer; mir brUUched                          |
| BJÖ [sd] | machen                                  | nein weisst du was wir brauchen wir brauchen das das              |
| BJÖ [nv] |                                         | ((zeigt auf das                                                   |
| BJÖ [a]  |                                         | 1-für 2a-ver 1-für 2a-zel 1-für 2a-bus 4-meta 4-frage 4-nonverbal |

[32]

| ..       | 128 [02:28.2]                                | 129 [02:28.9]                                  |
|----------|----------------------------------------------|------------------------------------------------|
| BJÖ [v]  | DAS dAs und dAs da dA.                       | wäisch woRUM. °h do cha me en BAUM felle,      |
| BJÖ [sd] | und das da da                                | weisst du warum da kann man einen Baum fällen  |
| BJÖ [nv] | Verbandszeug, das Zelt und das Buschmesser)) | ((imitiert mit der rechten Hand das Fällen     |
| BJÖ [a]  |                                              | 2a-bus 3a-in 3b-kond 3b-kaus 4-frage 4-diskurs |

[33]

| ..       | 130 [02:30.3]                                                | 131 [02:33.2]   |
|----------|--------------------------------------------------------------|-----------------|
| BJÖ [v]  | °h und wEnn irgendwIe °h es SCHIFF duurechUnt, chÖmm mir die |                 |
| BJÖ [sd] | und wenn irgendwie ein Schiff durchkommt                     | können wir die  |
| BJÖ [nv] | eines Baumes))                                               | ((zeigt auf das |
| BJÖ [a]  |                                                              |                 |

[34]

| ..       | 132 [02:35.4]                                                         | 133 [02:36.9]134 [02:37.4]135 [02:38.3] |
|----------|-----------------------------------------------------------------------|-----------------------------------------|
| SVE [v]  |                                                                       | WELI?                                   |
| SVE [sd] |                                                                       | welche                                  |
| SVE [a]  |                                                                       | 4-frage                                 |
| CEC [v]  |                                                                       | wEli AAzündE die hÄm-                   |
| CEC [sd] |                                                                       | welche anzünden diese ha                |
| CEC [nv] |                                                                       | ((zeigt auf die Leuchtraketen))         |
| CEC [a]  |                                                                       | 4-frage 4-meta                          |
| BJÖ [v]  | AAzündE? wIll mir hend jo denn (.) chÖnne BÄUM felle? °h chöm mIr (.) |                                         |
| BJÖ [sd] | anzünden weil wir haben ja dann Bäume fällen können                   | können wir nein die                     |
| BJÖ [nv] | Buschmesser))                                                         | ((zeigt beim ersten die"                |
| BJÖ [a]  |                                                                       | 4-meta                                  |

[35]

|          | 136 [02:38.9]                                                           | 137 [02:39.0]138 [02:40.5]          |
|----------|-------------------------------------------------------------------------|-------------------------------------|
| CEC [v]  |                                                                         |                                     |
| CEC [sd] |                                                                         |                                     |
| CEC [nv] |                                                                         |                                     |
| CEC [a]  |                                                                         |                                     |
| BJÖ [v]  | näi die (.) DIE nööd.                                                   | dEnn NIMMem (.) mit dEm             |
| BJÖ [sd] | die nicht                                                               | dann nehmen (wir) mit dem können    |
| BJÖ [nv] | auf Buschmesser und dann beim ausschliessenden die' auf Leuchtraketen)) |                                     |
| BJÖ [a]  |                                                                         | 1-für 2a-bus 3a-in 4-diskurs 4-rück |

[36]

|          | 139 [02:43.6]140 [02:43.9]                                             | 141 [02:45.2]142 [02:45.9]143 [02:47.0]                           |
|----------|------------------------------------------------------------------------|-------------------------------------------------------------------|
| CEC [v]  | aha jA ds FÜÜR,                                                        | ja-                                                               |
| CEC [sd] | aha ja das Feuer                                                       | ja                                                                |
| CEC [nv] | ((tut so, als ob sie zwei Stöcke aneinander reiben würde))             |                                                                   |
| CEC [a]  | 4-meta 4-nonverbal                                                     |                                                                   |
| BJÖ [v]  | chömmer denn (.) ähm; en bAUm felle denn hemmer HOLZ, denn chÖmmer mit |                                                                   |
| BJÖ [sd] | wir dann ähm                                                           | einen Baum fällen dann haben wir Holz dann können wir mit         |
| BJÖ [nv] |                                                                        | ((imitiert abermals wie er einen Baum fällt)) ((reibt Handflächen |
| BJÖ [a]  |                                                                        |                                                                   |

[37]

|          | 144 [02:47.5]145 [02:47.9]                                | 146 [02:50.0]                                                      |
|----------|-----------------------------------------------------------|--------------------------------------------------------------------|
| CEC [v]  |                                                           |                                                                    |
| CEC [sd] |                                                           |                                                                    |
| CEC [nv] |                                                           |                                                                    |
| BJÖ [v]  | eme Andere STÄcke; s hOlz AAzünde und in d LUFT uferÜere; | nAchert seends                                                     |
| BJÖ [sd] | einem anderen Stecken                                     | das Holz anzünden und in die Luft hochwerfen danach sehen es       |
| BJÖ [nv] | aneinander))                                              | ((streckt rechten Arm in die Luft, als würde er etwas hochwerfen)) |
| BJÖ [a]  |                                                           |                                                                    |

[38]

|          | 147 [02:51.4]148 [02:51.6]                           | 149 [02:52.1] |
|----------|------------------------------------------------------|---------------|
| SVE [v]  | oder nÄi mir bre (.) mir brENNet de hAlbi bAUm (aa); |               |
| SVE [sd] | oder nein wir bre wir brennen den halben Baum (an)   |               |
| SVE [a]  | 2a-bus 2a-leu 3a-zu                                  |               |
| BJÖ [v]  | d schIff AU? Ich wÜrd-                               |               |
| BJÖ [sd] | die Schiffe auch ich würde                           |               |
| BJÖ [a]  |                                                      |               |

[39]

|                 | 150 [02:54.2]151 [02:54.6]152 [02:55.3]                                       | 153 [02:55.9] |
|-----------------|-------------------------------------------------------------------------------|---------------|
| <b>SVE [v]</b>  | pch:::-                                                                       |               |
| <b>SVE [sd]</b> | pch                                                                           |               |
| <b>SVE [nv]</b> | ((imitiert durch Geräusch und fuchtelnden Armbewegungen ein loderndes Feuer)) |               |
| <b>SVE [a]</b>  | 2a-bus 2a-leu 3a-zu 4-nonverbal 4-rück                                        |               |
| <b>CEC [v]</b>  |                                                                               | näi oder      |
| <b>CEC [sd]</b> |                                                                               | nein oder     |
| <b>CEC [nv]</b> | ((lacht))                                                                     |               |
| <b>CEC [a]</b>  |                                                                               | 2a-leu 2a-    |
| <b>LAR [nv]</b> | ((lacht))                                                                     | ((lacht und   |
| <b>BJÖ [v]</b>  | JA (.) mir chÖnned-                                                           |               |
| <b>BJÖ [sd]</b> | ja wir können                                                                 |               |
| <b>BJÖ [nv]</b> | ((zeigt auf Buschmesser))                                                     |               |
| <b>[nv]</b>     | (-)                                                                           |               |

[40]

|                 | 155 [02:59.5]                                                              | 156 [03:00.1] |
|-----------------|----------------------------------------------------------------------------|---------------|
| <b>CEC [v]</b>  | oder de baum AA ähm äh-                                                    |               |
| <b>CEC [sd]</b> | oder den Baum an ähm äh                                                    | anzünden      |
| <b>CEC [nv]</b> |                                                                            |               |
| <b>CEC [a]</b>  | bus 3a-zu                                                                  | 2a-feu 2a-    |
| <b>LAR [nv]</b> | schauf zu BJÖ))                                                            |               |
| <b>BJÖ [v]</b>  | AAZÜNde pch:::-                                                            |               |
| <b>BJÖ [sd]</b> | anzünden pch                                                               |               |
| <b>BJÖ [nv]</b> | ((imitiert durch Geräusch und Gestik das Anzünden und Brennen des Baumes)) |               |
| <b>BJÖ [a]</b>  | 2a-feu 2a-bus 3a-zu 4-koko 4-meta                                          |               |

[41]

|                 | 157 [03:00.9]                                                        | 158 [03:02.7]                       | 159 [03:03.4] |
|-----------------|----------------------------------------------------------------------|-------------------------------------|---------------|
| <b>CEC [v]</b>  | AAzünde und denn (.) <<lachend> hehe denn explODIERT dr bAUm>;       |                                     |               |
| <b>CEC [sd]</b> | und dann dann explodiert der Baum                                    |                                     |               |
| <b>CEC [nv]</b> | ((unterstreicht mit ihrer Gestik Anzünden und Explosion des Baumes)) |                                     |               |
| <b>CEC [a]</b>  | bus 3a-zu 4-rück 4-extra 4-quae                                      |                                     |               |
| <b>BJÖ [v]</b>  |                                                                      | NÄI (.) lug ich wÜr DAS,            |               |
| <b>BJÖ [sd]</b> |                                                                      | nein schau ich würde das            |               |
| <b>BJÖ [nv]</b> |                                                                      | ((zeigt auf das Buschmesser))       |               |
| <b>BJÖ [a]</b>  |                                                                      | 1-für 2a-bus 1-für 2a-zel 1-für 2a- |               |

[42]

|          | 160 [03:04.8]                               | 161 [03:07.5]162 [03:07.7]          | 163 [03:08.2]164 [03:09.5] |
|----------|---------------------------------------------|-------------------------------------|----------------------------|
| SVE [v]  |                                             | NÄI ich würd s FÜÜRwerch nää.       |                            |
| SVE [sd] |                                             | nein ich würde das Feuerwerk nehmen |                            |
| SVE [a]  |                                             | 1-für 2a-leu                        |                            |
| CEC [v]  |                                             | jä:-                                |                            |
| CEC [sd] |                                             | ja                                  |                            |
| BJÖ [v]  | ähm DAS un:d dAs; °h                        | DIE drüü nää.                       |                            |
| BJÖ [sd] | ähm das und das                             | diese drei nehmen                   |                            |
| BJÖ [nv] | ((zeigt auf das Zelt und das Verbandszeug)) |                                     |                            |
| BJÖ [a]  | ver 4-nonverbal 4-meta                      |                                     |                            |
| [nv]     |                                             |                                     | (1.0)                      |

[43]

|          | 165 [03:10.5]                   | 166 [03:12.3]                          | 167 [03:13.3] |
|----------|---------------------------------|----------------------------------------|---------------|
| SVE [v]  |                                 | Ebe mit HOLZ,                          |               |
| SVE [sd] |                                 | eben mit Holz                          |               |
| SVE [a]  |                                 | 2a-leu 3a-ab                           |               |
| BJÖ [v]  | wiSOO wIe wEttschs AAzündē;     | jO und wie wEtsch en BAUM              |               |
| BJÖ [sd] | wieso wie willst du es anzünden | ja und wie willst du einen Baum fällen |               |
| BJÖ [a]  | 2a-leu 3a-ab 4-frage            | 2a-leu 3a-ab 4-frage                   |               |

[44]

|          | 168 [03:15.4]169 [03:16.0]                        | 170 [03:17.9]171 [03:19.2] |
|----------|---------------------------------------------------|----------------------------|
| SVE [v]  | jo brUUuchsch jo nIt en gAnze BAUM;               |                            |
| SVE [sd] | ja du brauchst ja nicht einen ganzen Baum         |                            |
| SVE [a]  | 2a-leu 3a-ab                                      |                            |
| CEC [v]  | aso wÄisch (.) mir chÖnd ESCHT ab (-) zIe.        |                            |
| CEC [sd] | also weisst du wir können Äste abziehen           |                            |
| CEC [nv] | ((imitiert mit den Armen das Abreißen von Ästen)) |                            |
| CEC [a]  | 2a-leu 3a-ab                                      |                            |
| BJÖ [v]  | fElle;                                            | jA: aber die sind          |
| BJÖ [sd] |                                                   | ja aber die sind           |
| BJÖ [a]  |                                                   | 2a-leu 3a-ab 4-quae        |

[45]

| ..       |                                               | 172 [03:22.1]          | 173 [03:23.1]174 [03:23.7] |
|----------|-----------------------------------------------|------------------------|----------------------------|
| SVE [v]  |                                               | mUess nöd grad SII,    |                            |
| SVE [sd] |                                               | muss nicht gerade sein |                            |
| SVE [a]  |                                               | 2a-leu 3a-ab 4-quae    |                            |
| CEC [v]  |                                               |                        | mIr chÖntet                |
| CEC [sd] |                                               |                        | wir könnten ja             |
| CEC [a]  |                                               |                        | 2a-leu 3a-                 |
| BJÖ [v]  | eiglech schO chli HÖCH obe Amigs;             |                        |                            |
| BJÖ [sd] | eigentlich schon ein wenig hoch oben manchmal |                        |                            |
| BJÖ [a]  |                                               |                        |                            |
| [nv]     |                                               |                        | (--)                       |

[46]

| ..       |                                        | 175 [03:25.8]                                             |
|----------|----------------------------------------|-----------------------------------------------------------|
| CEC [v]  | ja au uf de BAUM <<lachend> chlÄttre>. |                                                           |
| CEC [sd] | auch auf den Baum klettern             |                                                           |
| CEC [a]  | mehrfach 4-quae                        |                                                           |
| BJÖ [v]  |                                        | tz tz tz tz und NACHer ghEi mer Abe                       |
| BJÖ [sd] |                                        | tz tz tz tz und danach fallen wir runter pf ah            |
| BJÖ [nv] |                                        | ((imitiert mit seiner Mimik und Gestik das Heraufklettern |
| BJÖ [a]  |                                        | 2a-leu 3a-ab 4-quae                                       |

[47]

| ..       |                                 | 176 [03:29.3]177 [03:29.6]178 [03:30.2]                        |
|----------|---------------------------------|----------------------------------------------------------------|
| SVE [v]  |                                 | NÄ:I chUm (.) nämmе mer DIE drüü und                           |
| SVE [sd] |                                 | nein komm nehmen wir diese drei und das                        |
| SVE [nv] |                                 | ((zeigt auf Leuchtraketen, evtl. auf Buschmesser, Verbandszeug |
| SVE [a]  |                                 | 1-th 2a-leu 1-th 2a-bus 1-th 2a-ver 1-th 2a-zel 4-meta 4       |
| BJÖ [v]  | pf: ah::-                       | NÄI,                                                           |
| BJÖ [sd] |                                 | nein                                                           |
| BJÖ [nv] | sowie Herunterfallen vom Baum)) |                                                                |
| BJÖ [a]  |                                 |                                                                |
| [nv]     |                                 | (-)                                                            |

[48]

|          | 179 [03:30.8]  | 180 [03:33.2] | 181 [03:33.9]                                                  | 182 [03:34.2] | 183 [03:35.6] |
|----------|----------------|---------------|----------------------------------------------------------------|---------------|---------------|
| SVE [v]  | dAs.           |               | CHUM;                                                          |               | me chA        |
| SVE [sd] |                |               | komm                                                           |               | man kann      |
| SVE [nv] | und das Zelt)) |               |                                                                |               |               |
| SVE [a]  | -nonverbal     |               |                                                                |               | 4-meta        |
| CEC [v]  |                |               | mer chÖn nUme DRÜÜ;                                            |               |               |
| CEC [sd] |                |               | wir können nur drei                                            |               |               |
| CEC [nv] |                |               | ((zeigt auf das Zelt, die Leuchtraketen und das Verbandszeug)) |               |               |
| CEC [a]  |                |               | 4-meta                                                         |               |               |
| [nv]     |                | (--)          |                                                                |               |               |

[49]

|          | 184 [03:35.6]   | 185 [03:36.2] | 186 [03:36.6]             | 187 [03:37.5]                                       | 188 [03:37.8] |
|----------|-----------------|---------------|---------------------------|-----------------------------------------------------|---------------|
| SVE [v]  | nur DRÜÜ sAche. |               |                           |                                                     |               |
| SVE [sd] | nur drei Sachen |               |                           |                                                     |               |
| SVE [a]  |                 |               |                           |                                                     |               |
| CEC [v]  |                 |               | das isch jetzt Üsi WAAL;  | aso s ZÄLT näme mer °h sIcher.                      |               |
| CEC [sd] |                 |               | das ist jetzt unsere Wahl | also das Zelt nehmen wir sicher                     |               |
| CEC [nv] |                 |               |                           | ((nimmt Finger wieder weg von den Leuchtraketen und |               |
| CEC [a]  |                 |               | 1-th 2a-zel 4-meta        |                                                     |               |
| BJÖ [v]  | Ebe.            |               |                           |                                                     |               |
| BJÖ [sd] | eben            |               |                           |                                                     |               |

[50]

|          | ..                                                 | 189 [03:40.1]      | 190 [03:41.2]                         | 191 [03:41.4]      |
|----------|----------------------------------------------------|--------------------|---------------------------------------|--------------------|
| SVE [v]  |                                                    | zElt SIcher.       |                                       |                    |
| SVE [sd] |                                                    | Zelt sicher        |                                       |                    |
| SVE [a]  |                                                    | 1-th 2a-zel 4-meta |                                       |                    |
| CEC [v]  |                                                    |                    | und dAs AU;                           | °h                 |
| CEC [sd] |                                                    |                    | und das auch                          | aber das           |
| CEC [nv] | dem Verbandszeug und zeigt nur noch auf das Zelt)) |                    | ((zeigt auf das Verbandszeug))        |                    |
| CEC [a]  |                                                    |                    | 1-th 2a-ver 4-nonverbal 4-meta 4-meta |                    |
| BJÖ [v]  |                                                    |                    |                                       | Aso (.) DAS        |
| BJÖ [sd] |                                                    |                    |                                       | also das brauchen  |
| BJÖ [nv] |                                                    |                    |                                       | ((zeigt auf den    |
| BJÖ [a]  |                                                    |                    |                                       | 1-geg 2a-koc 3a-in |

[51]

| ..              | 193 [03:43.8]                                                  | 194 [03:44.6]               | 195 [03:45.3]            | 196 [03:46.7]                | 197 [03:47.6]          |
|-----------------|----------------------------------------------------------------|-----------------------------|--------------------------|------------------------------|------------------------|
| <b>SVE [v]</b>  |                                                                |                             |                          | aso                          | DIE zwäi sAche         |
| <b>SVE [sd]</b> |                                                                |                             |                          | also                         | diese zwei Sachen sind |
| <b>SVE [nv]</b> |                                                                |                             |                          | ((zeigt auf das Zelt und das |                        |
| <b>SVE [a]</b>  |                                                                |                             |                          | 1-th 2a-zel 1-th 2a-ver 4-   |                        |
| <b>CEC [v]</b>  | aber s DRITte wÜsse mer no nId;                                |                             | JA;                      |                              | ja PILZli Au.          |
| <b>CEC [sd]</b> | Dritte wissen wir noch nicht                                   |                             | ja                       |                              | ja Pilze auch          |
| <b>CEC [a]</b>  |                                                                |                             |                          |                              | 2a-koc 3a-zu 4-        |
| <b>BJÖ [v]</b>  | bruuche mer nÖd. ÄSse hEts wahrschinli; °h BEEri und so sAche; |                             |                          |                              |                        |
| <b>BJÖ [sd]</b> | wir nicht                                                      | Essen hat es wahrscheinlich | Beeren und solche Sachen |                              |                        |
| <b>BJÖ [nv]</b> | <i>Kochtopf)</i>                                               |                             |                          |                              |                        |
| <b>BJÖ [a]</b>  |                                                                |                             |                          |                              |                        |

[52]

| ..              | 198 [03:48.5]        | 199 [03:49.4]                              | 200 [03:49.4] | 201 [03:51.2*]                  |
|-----------------|----------------------|--------------------------------------------|---------------|---------------------------------|
| <b>SVE [v]</b>  | sind sIcher.         |                                            |               |                                 |
| <b>SVE [sd]</b> | sicher               |                                            |               |                                 |
| <b>SVE [nv]</b> | <i>Verbandszeug)</i> |                                            |               |                                 |
| <b>SVE [a]</b>  | nonverbal 4-meta     |                                            |               |                                 |
| <b>CEC [v]</b>  |                      | JA;                                        |               |                                 |
| <b>CEC [sd]</b> |                      | ja                                         |               |                                 |
| <b>CEC [a]</b>  | koko                 |                                            |               |                                 |
| <b>BJÖ [v]</b>  |                      | jä DIE sind scho mal sIcher;               |               | °h und jetzt Entweder           |
| <b>BJÖ [sd]</b> |                      | ja die sind schon einmal sicher            |               | und jetzt entweder das oder das |
| <b>BJÖ [nv]</b> |                      | ((zeigt auf Zelt und Verbandszeug))        |               | ((zeigt auf Buschmesser und     |
| <b>BJÖ [a]</b>  |                      | 1-th 2a-zel 1-th 2a-ver 4-meta 4-nonverbal |               | 1-th 2a-bus 1-th 2a-leu 4-meta  |

[53]

| ..              | 202 [03:53.3]          | 203 [03:54.0]               | 204 [03:54.3]                                        | 205 [03:55.0]                      | 206 [03:55.1] |
|-----------------|------------------------|-----------------------------|------------------------------------------------------|------------------------------------|---------------|
| <b>CEC [v]</b>  |                        | ich wÜrd DAS.               |                                                      |                                    |               |
| <b>CEC [sd]</b> |                        | ich würde das               |                                                      |                                    |               |
| <b>CEC [nv]</b> |                        | ((zeigt auf Leuchtraketen)) |                                                      |                                    |               |
| <b>CEC [a]</b>  |                        | 1-für 2a-leu 4-nonverbal    |                                                      |                                    |               |
| <b>BJÖ [v]</b>  | DAS oder dAs.          |                             | Ich wür DAS.                                         | nÄi ich wÜrd das wÄisch            |               |
| <b>BJÖ [sd]</b> |                        |                             | ich würde das                                        | nein ich würde das weisst du warum |               |
| <b>BJÖ [nv]</b> | <i>Leuchtraketen))</i> |                             | ((zeigt auf das Buschmesser))                        |                                    |               |
| <b>BJÖ [a]</b>  | 4-nonverbal            |                             | 1-für 2a-bus 2a-leu 3a-ab 3b-kaus 3b-kond 4-frage 4- |                                    |               |
| <b>[nv]</b>     |                        | (--)                        |                                                      |                                    |               |

[54]

| ..       |                     | 207 [03:56.6]          | 208 [03:57.5] | 209 [03:58.4]                                 | 210 [04:01.1]                                      |
|----------|---------------------|------------------------|---------------|-----------------------------------------------|----------------------------------------------------|
| CEC [v]  |                     |                        |               |                                               | ah jA au für PILZ und so fürs Ässe.                |
| CEC [sd] |                     |                        |               |                                               | ah ja auch für Pilze und so für das Essen          |
| CEC [nv] |                     | ((schüttelt den Kopf)) |               | ((fuchelt mit rechtem Arm in der Luft herum)) |                                                    |
| CEC [a]  |                     |                        |               |                                               | 2a-bus 3a-zu 4-koko                                |
| BJÖ [v]  | woRUM;              |                        |               |                                               | will wEmmer dAs (.) wenn sii bi ÜÜS dAs nit seend; |
| BJÖ [sd] |                     |                        |               |                                               | weil wenn wir das wenn sie bei uns das nicht sehen |
| BJÖ [nv] |                     |                        |               |                                               | ((zeigt auf die Leuchtraketen))                    |
| BJÖ [a]  | nonverbal 4-diskurs |                        |               |                                               |                                                    |

[55]

| 211 [04:01.4] |                                                                  | 212 [04:04.9] |
|---------------|------------------------------------------------------------------|---------------|
| BJÖ [v]       | und mir hEnd nume DRÜÜ (.) IUg (.) mir hEnd nid sOO vll vo dEne. |               |
| BJÖ [sd]      | und wir haben nur drei schau wir haben nicht so viele von diesen |               |
| BJÖ [nv]      | ((kreist mehrmals um das Leuchtraketen-Bild))                    |               |
| BJÖ [a]       |                                                                  |               |
| [nv]          |                                                                  | (--)          |

[56]

| 213 [04:05.6] |                                                                         | 214 [04:07.1]                        | 215 [04:08.5] | 216 [04:08.7]                  |
|---------------|-------------------------------------------------------------------------|--------------------------------------|---------------|--------------------------------|
| SVE [v]       |                                                                         |                                      |               | okEE denn nemme                |
| SVE [sd]      |                                                                         |                                      |               | okay nehmen wir die            |
| SVE [nv]      |                                                                         |                                      |               | ((hält den Finger auf Zelt und |
| SVE [a]       |                                                                         |                                      |               | 1-th 2a-zel 1-th 2a-ver 1-     |
| BJÖ [v]       | dEnne (.) hemmer PÄCH gha, und nAcher chÖmmer !NIE! mEE fUrt; Aber DAS, |                                      |               |                                |
| BJÖ [sd]      | dann haben wir Pech gehabt                                              | und nachher kommen wir nie mehr fort |               | aber das                       |
| BJÖ [nv]      |                                                                         |                                      |               | ((zeigt auf das                |
| BJÖ [a]       |                                                                         |                                      |               | 2a-bus 4-                      |

[57]

| ..       |                                               | 217 [04:09.5] | 218 [04:09.9*] | 219 [04:10.4] | 220 [04:10.6]                                                              |
|----------|-----------------------------------------------|---------------|----------------|---------------|----------------------------------------------------------------------------|
| SVE [v]  | mer DIE.                                      |               |                |               | DIE drÜÜ sAche.                                                            |
| SVE [sd] |                                               |               |                |               | die drei Sachen                                                            |
| SVE [nv] | zusätzlich auf Verbandszeug und Buschmesser)) |               |                |               | ((zeigt auf das Verbandszeug, Zelt und Buschmesser))                       |
| SVE [a]  | th 2a-bus 4-meta 4-nonverbal                  |               |                |               | 1-th 2a-ver 1-th 2a-zel 1-th 2a-bus 4-meta 4-                              |
| CEC [v]  |                                               |               |                |               | dle DRÜÜ::;                                                                |
| CEC [sd] |                                               |               |                |               | die drei                                                                   |
| CEC [nv] |                                               |               |                |               | ((schaut auf SVEs Blatt und zeigt bei sich ebenfalls auf Buschmesser, Zelt |
| CEC [a]  |                                               |               |                |               | 1-th 2a-bus 1-th 2a-zel 1-th 2a-ver 4-meta 4-                              |
| BJÖ [v]  |                                               |               |                |               | Ebe.                                                                       |
| BJÖ [sd] |                                               |               |                |               | eben                                                                       |
| BJÖ [nv] | Buschmesser))                                 |               |                |               |                                                                            |
| BJÖ [a]  | nonverbal                                     |               |                |               |                                                                            |



[58]

| ..       |                    | 221 [04:11.2]222 [04:11.7]223 [04:12.0] | 224 [04:12.7]225 [04:14.0] |
|----------|--------------------|-----------------------------------------|----------------------------|
| SVE [v]  |                    |                                         | NÄ:I                       |
| SVE [sd] |                    |                                         | nein Sackmesser            |
| SVE [nv] |                    |                                         |                            |
| SVE [a]  | nonverbal          |                                         | 1-geg 2a-sac               |
| CEC [v]  |                    | wisOO nEmme mer nöd s SACKmÄsser?       |                            |
| CEC [sd] |                    | wieso nehmen wir nicht das Sackmesser   |                            |
| CEC [nv] | und Verbandszeug)) | ((zeigt auf das Sackmesser))            |                            |
| CEC [a]  | nonverbal          | 2a-sac 4-frage                          |                            |
| BJÖ [v]  |                    | DE dO?                                  | NÄ:I (.) das               |
| BJÖ [sd] |                    | dieser da                               | nein das ist stärker       |
| BJÖ [nv] |                    | ((zeigt auf Buschmesser))               | ((zeigt auf                |
| BJÖ [a]  |                    | 2a-bus 4-frage                          | 2a-bus 2a-sac 3a-ab        |
| [nv]     |                    | (-)                                     |                            |

[59]

| ..       |                | 226 [04:15.3]227 [04:15.8] | 228 [04:16.2]229 [04:16.8]                                  | 230 [04:17.0] |
|----------|----------------|----------------------------|-------------------------------------------------------------|---------------|
| SVE [v]  | sAackmesser-   |                            |                                                             |               |
| SVE [sd] |                |                            |                                                             |               |
| SVE [a]  |                |                            |                                                             |               |
| CEC [v]  |                |                            | jA (.) isch GUET.                                           |               |
| CEC [sd] |                |                            | ja ist gut                                                  |               |
| CEC [nv] |                |                            | ((legt ihre Finger auf Buschmesser, Zelt und Verbandszeug)) |               |
| CEC [a]  |                |                            | 1-th 2a-bus 1-th 2a-zel 1-th 2a-ver 4-meta 4-nonverbal      |               |
| BJÖ [v]  | isch STÄRcher. | mit DEM chasch nÖd,        |                                                             | lUg (.)       |
| BJÖ [sd] |                | mit dem kannst du nicht    |                                                             | schau mit     |
| BJÖ [nv] | Buschmesser))  | ((zeigt auf Sackmesser))   |                                                             | ((zeigt nach  |
| BJÖ [a]  | 4-nonverbal    |                            |                                                             | 2a-sac 3a-    |

[60]

| 231 [04:17.7] |                                                                  | 232 [04:18.9]233 [04:19.8]                      |
|---------------|------------------------------------------------------------------|-------------------------------------------------|
| LAR [v]       |                                                                  | hihihi                                          |
| LAR [sd]      |                                                                  | hihihi                                          |
| BJÖ [v]       | mit dEm chasch nÖd en BAUM felle;                                | (-) mUsch WUche ha; h° °h h°                    |
| BJÖ [sd]      | dem kannst du nicht einen Baum fällen                            | du musst Wochen haben                           |
| BJÖ [nv]      | vorne und imitiert dann das Schneiden mit einem kleinen Messer)) | ((imitiert das Schneiden mit angestrengtem Ein- |
| BJÖ [a]       | ab 4-rück                                                        |                                                 |
| [nv]          |                                                                  | ((alle schauen grinsend zu BJÖ))                |

[61]

| 234 [04:20.1] |                | 235 [04:22.3]236 [04:22.5]237 [04:22.7]238 [04:24.4]        |
|---------------|----------------|-------------------------------------------------------------|
| CEC [v]       |                | Okei mir HÄNDS (.) jEttz.                                   |
| CEC [sd]      |                | okay wir haben es jetzt                                     |
| CEC [a]       |                | 4-meta                                                      |
| LAR [v]       | hihihi         |                                                             |
| LAR [sd]      | hihihi         |                                                             |
| BJÖ [v]       |                | DAS dAs und dAs (--) äh dAs.                                |
| BJÖ [sd]      |                | das das und das äh das                                      |
| BJÖ [nv]      | und Ausatmen)) | ((zeigt auf Buschmesser, Zelt und zuerst auf Leuchtraketen, |
| BJÖ [a]       |                | 1-th 2a-bus 1-th 2a-zel 1-th 2a-ver 4-meta 4-nonverbal      |
| [nv]          |                |                                                             |

[62]

| .. 239 [04:24.8]240 [04:27.0]241 [04:28.1]242 [04:29.0] |                                                               |
|---------------------------------------------------------|---------------------------------------------------------------|
| CEC [v]                                                 | JA.                                                           |
| CEC [sd]                                                | ja                                                            |
| CEC [a]                                                 |                                                               |
| BJÖ [v]                                                 | ((unverständlich, ca. 0.9                                     |
| BJÖ [sd]                                                | ((unverständlich, ca. 0.9 Sek.))                              |
| BJÖ [nv]                                                | <i>korrigiert sich dies dann und zeigt auf Verbandszeug))</i> |
| BJÖ [a]                                                 |                                                               |
| [nv]                                                    | (1.1)                                                         |

[63]

| .. 243 [04:29.9]244 [04:30.9]245 [04:31.5]246 [04:31.9]247 [04:32.7]248 [04:33.5]249 [04:34.2]250 [04:34.7] |                             |
|-------------------------------------------------------------------------------------------------------------|-----------------------------|
| SVE [v]                                                                                                     | NÄI;                        |
| SVE [sd]                                                                                                    | nein                        |
| CEC [v]                                                                                                     | (xxx xxx) JETZT,            |
| CEC [sd]                                                                                                    | (xxx xxx) jetzt             |
| CEC [nv]                                                                                                    |                             |
| CEC [a]                                                                                                     |                             |
| LAR [v]                                                                                                     | ZÄÄ minUte;                 |
| LAR [sd]                                                                                                    | zehn Minuten                |
| LAR [nv]                                                                                                    | ((schaut zu BJÖ und lacht)) |
| LAR [a]                                                                                                     | ((verschränkt die Arme))    |
| BJÖ [v]                                                                                                     | Sek.))                      |
| BJÖ [sd]                                                                                                    |                             |
| [nv]                                                                                                        | (-)                         |

[64]

| .. 251 [04:36.3]252 [04:37.0] 253 [04:37.6*]254 [04:38.0]255 [04:38.2] |                                   |
|------------------------------------------------------------------------|-----------------------------------|
| CEC [v]                                                                | WARte hm-                         |
| CEC [sd]                                                               | warten hm                         |
| CEC [nv]                                                               | <i>auf ihre Hände und lacht))</i> |
| CEC [a]                                                                |                                   |
| BJÖ [v]                                                                |                                   |
| BJÖ [sd]                                                               |                                   |
| [nv]                                                                   |                                   |

|                |                               |
|----------------|-------------------------------|
| WÄMmer,        | sii het gsÄit mir SÖLled sii- |
| wollen wir     | sie hat gesagt wir sollen sie |
|                |                               |
| 4-frage 4-meta |                               |
|                | mIr CHÖND au;                 |
|                | wir können auch               |
| (-)            | (-)                           |

[65]

| ..257 [04:39.5] |                                                                                                    | 258 [04:42.4] |
|-----------------|----------------------------------------------------------------------------------------------------|---------------|
| SVE [v]         |                                                                                                    | nÄi HOL sii   |
| SVE [sd]        |                                                                                                    | nein hol sie  |
| SVE [a]         |                                                                                                    | 4-meta        |
| CEC [v]         | (-) wArt ich gAng gschwInd go lUEge (ups),                                                         |               |
| CEC [sd]        | warte ich gehe schnell schauen (ups)                                                               |               |
| CEC [nv]        | ((dreht sich auf dem Stuhl nach links und nimmt Beine unter dem Tisch hervor auf die linke Seite)) |               |
| CEC [a]         |                                                                                                    |               |

[66]

| ..       |                                       | 259 [04:43.7] | 260 [04:45.7] |
|----------|---------------------------------------|---------------|---------------|
| SVE [v]  | schnÄll.                              |               |               |
| SVE [sd] | schnell                               |               |               |
| SVE [a]  |                                       |               |               |
| CEC [nv] | <i>((steht auf und geht zur Tür))</i> |               |               |
