# Supplementary material for: Oral Argumentation Skills between Process and Product
Source: MDPI journal article supplement (doi:10.3390/languages7020139), 2022-05-30
Supplement: s1 [file s1]

[1]

| 0 [00:00.0] 1 |                                           | 2 [00:00.1]3 [00:01.8]4 [00:01.9] |                         | 5 [00:02.0] 6 [00:02.1] |
|---------------|-------------------------------------------|-----------------------------------|-------------------------|-------------------------|
| VAL [nv]      |                                           | ((schaut zu VLI))                 |                         |                         |
| MAR [nv]      |                                           | ((schaut zu VLI))                 |                         |                         |
| RIC [v]       |                                           | ich besprÄchs mit mir eLÄIge;     |                         |                         |
| RIC [sd]      |                                           | ich bespreche es mit mir alleine  |                         |                         |
| RIC [nv]      | ((nimmt Blatt in die Hand und steht auf)) | ((hält den Zeigefinger hoch))     | ((läuft vom Tisch weg)) |                         |
| RIC [a]       |                                           | 4-meta 4-frage                    |                         |                         |
| NOR [nv]      |                                           | ((schaut in die Kamera))          |                         |                         |
| [k]           | Instruktion                               |                                   |                         |                         |

[2]

| ..8 [00:02.8]9 [00:02.9] |                           | 10 [00:03.0]11 [00:04.2]12 [00:04.3]13 [00:04.4] | 14 [00:04.7]15 [00:04.9]16 [00:05.0] |
|--------------------------|---------------------------|--------------------------------------------------|--------------------------------------|
| VAL [nv]                 |                           | ((steht auf und wendet sich MAR und NOR zu))     |                                      |
| MAR [nv]                 |                           | ((lehnt sich zu NOR))                            |                                      |
| RIC [v]                  | ich bi dr ÄINzig bueb?    |                                                  |                                      |
| RIC [sd]                 | ich bin der einzige Junge |                                                  |                                      |
| RIC [nv]                 |                           |                                                  |                                      |
| RIC [a]                  |                           |                                                  |                                      |
| VL1 [v]                  |                           | bleibt mal schön da                              |                                      |
| VL1 [sd]                 |                           | bleibt mal schön da sitzen                       |                                      |
| [k]                      |                           | jemand sagt: hm?                                 |                                      |

[3]

| ..18 [00:06.1]19 [00:06.3]20 [00:06.9] |                                | 21 [00:07.6]22 [00:09.4]23 [00:09.4]24 [00:10.2] |  |
|----------------------------------------|--------------------------------|--------------------------------------------------|--|
| VAL [nv]                               |                                | ((setzt sich wieder halb auf ihren Stuhl))       |  |
| RIC [v]                                |                                | IIR könntets                                     |  |
| RIC [sd]                               |                                | ihr könnt es besprechen ich                      |  |
| RIC [nv]                               | ((setzt sich die Fensterbank)) | ((steht auf, zeigt auf die restliche Gruppe))    |  |
| RIC [a]                                |                                | 4-meta                                           |  |
| NOR [nv]                               |                                | ((steht auf und steht                            |  |
| VL1 [v]                                | SITzen?                        |                                                  |  |
| VL1 [sd]                               |                                |                                                  |  |

[4]

| .. 25 [00:10.3]26 [00:10.5]27 [00:10.9]28 [00:11.2]29 [00:11.3]30 [00:11.6]31 [00:12.6]32 [00:12.7] |                                  | 33 [00:13.4]                     |
|-----------------------------------------------------------------------------------------------------|----------------------------------|----------------------------------|
| VAL [v]                                                                                             |                                  | ((unverständlich, ca. 1.8        |
| VAL [sd]                                                                                            |                                  | ((unverständlich, ca. 1.8 Sek.)) |
| MAR [v]                                                                                             | nOra ma m mÄche MIRs zäme,       |                                  |
| MAR [sd]                                                                                            | Nora ma m machen wir es zusammen |                                  |
| MAR [nv]                                                                                            | ((steht auf))                    |                                  |
| MAR [a]                                                                                             | 4-meta 4-frage                   |                                  |
| RIC [v]                                                                                             | besprÄche (-) Ich aber elÄi;     | ((unverständlich, ca. 1.5 Sek.)) |
| RIC [sd]                                                                                            | aber alleine                     | ((unverständlich, ca. 1.5 Sek.)) |
| RIC [nv]                                                                                            |                                  | ((sitzt wieder ab))              |
| RIC [a]                                                                                             |                                  |                                  |
| NOR [v]                                                                                             |                                  | mir makes ALLi                   |
| NOR [sd]                                                                                            |                                  | wir machen es alle zusammen      |
| NOR [nv]                                                                                            | neben MAR))                      | ((dreht ihr                      |
| NOR [a]                                                                                             |                                  | 4-meta                           |

[5]

| ..       |                                              | 34 [00:14.1]35 [00:14.2]36 [00:14.5*] | 37 [00:15.0] |
|----------|----------------------------------------------|---------------------------------------|--------------|
| VAL [v]  | Sek.))                                       |                                       |              |
| VAL [sd] |                                              |                                       |              |
| RIC [v]  |                                              |                                       |              |
| RIC [sd] |                                              |                                       |              |
| NOR [v]  | zÄmme;                                       | Ich glaub ich WEISS                   |              |
| NOR [sd] |                                              | ich glaub ich weiss was wir           |              |
| NOR [nv] | Namensschild um))                            |                                       |              |
| NOR [a]  |                                              | 1-für 2a-han                          |              |
| [nv]     | ((VAL, MAR und NOR rücken näher zueinander)) |                                       |              |

[6]

| ..       |                                                        | 38 [00:17.0] | 39 [00:17.8] | 40 [00:18.5] | 41 [00:19.7] |
|----------|--------------------------------------------------------|--------------|--------------|--------------|--------------|
| VAL [v]  | WAS (für)? NÄI: de wäi, °h döt hEts jo                 |              |              |              |              |
| VAL [sd] | was (für)        nein de wei        dort hat es ja auf |              |              |              |              |
| VAL [a]  | 2a-han 3a-ab 4-frage                                   |              |              |              |              |
| NOR [v]  | was man brAuchen kann; ein TElefon (zum) Anrufen?      |              |              |              |              |
| NOR [sd] | brauchen können        ein Telefon (zum) anrufen       |              |              |              |              |
| NOR [a]  |                                                        |              |              |              |              |

[7]

| ..       |                                               | 42 [00:22.8]       | 43 [00:23.6] | 44 [00:24.0]            | 45 [00:24.1] |
|----------|-----------------------------------------------|--------------------|--------------|-------------------------|--------------|
| VAL [v]  | uf dene älnsame Insle hets jo käi STROM.      |                    | <<flüsternd> | aso                     | wle          |
| VAL [sd] | diesen einsamen Inseln hat es ja keinen Strom |                    | also         | wie können wir dann mit |              |
| VAL [a]  |                                               |                    |              |                         |              |
| MAR [v]  |                                               |                    |              | JÄ.                     |              |
| MAR [sd] |                                               |                    |              | ja                      |              |
| MAR [nv] |                                               | ((setzt sich hin)) |              |                         |              |
| RIC [v]  |                                               | (SACKmesse::r;)    |              |                         |              |
| RIC [sd] |                                               | (Sackmesser)       |              |                         |              |
| RIC [a]  |                                               | 1-für 2a-sac       |              |                         |              |

[8]

| 46 [00:24.5] |                                                    | 47 [00:25.8]48 [00:25.8]49 [00:27.5]50 [00:27.9] |  | 51 [00:28.3] |
|--------------|----------------------------------------------------|--------------------------------------------------|--|--------------|
| VAL [v]      | chömmmer denn mit eme HENdi aa(lüte),>             |                                                  |  |              |
| VAL [sd]     | einem Handy anrufen                                |                                                  |  |              |
| VAL [nv]     | ((dreht sich zu RIC um))                           |                                                  |  |              |
| VAL [a]      |                                                    |                                                  |  |              |
| MAR [nv]     | ((dreht sich                                       |                                                  |  |              |
| NOR [nv]     | ((dreht sich zu RIC um))                           |                                                  |  |              |
| VL2 [v]      | Also ihr sOlltets schon zu VIERT (.) zusAmmen      |                                                  |  |              |
| VL2 [sd]     | also ihr solltet es schon zu viert zusammen machen |                                                  |  |              |

[9]

|                 | .. 52 [00:28.5]53 [00:28.6]54 [00:28.9]                     | 55 [00:29.8]           | 56 [00:30.3]57 [00:30.5]58 [00:31.0] |
|-----------------|-------------------------------------------------------------|------------------------|--------------------------------------|
| <b>VAL [nv]</b> |                                                             |                        |                                      |
| <b>MAR [nv]</b> | zu RIC um))                                                 |                        |                                      |
| <b>RIC [v]</b>  | <<laut> na::i->                                             |                        |                                      |
| <b>RIC [sd]</b> | nein                                                        |                        |                                      |
| <b>RIC [nv]</b> | ((hält langsam sein Blatt in die Höhe und lässt es fallen)) |                        |                                      |
| <b>NOR [v]</b>  |                                                             |                        | ja:: riCA:Rdo:-                      |
| <b>NOR [sd]</b> |                                                             |                        | ja Ricardo                           |
| <b>NOR [a]</b>  |                                                             |                        | 4-meta 4-norm                        |
| <b>VL2 [v]</b>  | mAchen,                                                     | als GRUPpe, DOCH doch; |                                      |
| <b>VL2 [sd]</b> |                                                             | als Gruppe doch doch   |                                      |

[10]

|                 | 59 [00:33.7]       | 60 [00:34.7]                               | 61 [00:35.2]62 [00:35.4]63 [00:36.1]64 [00:37.2] |
|-----------------|--------------------|--------------------------------------------|--------------------------------------------------|
| <b>VAL [v]</b>  |                    | und Aso,                                   | ICH würde sAgen (.)                              |
| <b>VAL [sd]</b> |                    | und also                                   | ich würde sagen wir brauchen                     |
| <b>VAL [a]</b>  |                    | 1-für 2a-zel 3a-in                         |                                                  |
| <b>RIC [nv]</b> |                    | ((lässt seine Arme auf den Schoss fallen)) |                                                  |
| <b>NOR [v]</b>  |                    |                                            | <<leise> ein                                     |
| <b>NOR [sd]</b> |                    |                                            | ein Feuer                                        |
| <b>NOR [nv]</b> | ((schaut zu RRIC)) |                                            |                                                  |
| <b>[nv]</b>     |                    |                                            | (--)                                             |

[11]

|                 | .. 65 [00:37.8]                         | 66 [00:38.6]67 [00:38.9]68 [00:39.3]     | 69 [00:39.8]70 [00:40.0] |
|-----------------|-----------------------------------------|------------------------------------------|--------------------------|
| <b>VAL [v]</b>  | wir brauchen ein ZELT zum schlAfen,     |                                          |                          |
| <b>VAL [sd]</b> | ein Zelt zum Schlafen                   |                                          |                          |
| <b>VAL [nv]</b> | ((kreist mit dem Finger über dem Zelt)) |                                          |                          |
| <b>VAL [a]</b>  |                                         |                                          |                          |
| <b>RIC [v]</b>  |                                         | nä::-                                    |                          |
| <b>RIC [sd]</b> |                                         | nee                                      |                          |
| <b>RIC [nv]</b> |                                         | ((steht auf und läuft zum Tisch zurück)) |                          |
| <b>NOR [v]</b>  | FEUer->                                 |                                          | <<leise>                 |
| <b>NOR [sd]</b> |                                         |                                          | und ein                  |
| <b>NOR [nv]</b> |                                         | ((nickt einmal kurz))                    |                          |
| <b>NOR [a]</b>  |                                         |                                          | 1-th 2a-leu              |

[12]

| 71 [00:40.7]72 [00:41.1]73 [00:41.7] |                                                                |
|--------------------------------------|----------------------------------------------------------------|
| VAL [v]                              | NÄI,                                                           |
| VAL [sd]                             | nein                                                           |
| MAR [v]                              | und Ich würd sÄge dass me (-) dass mir au e DEcki              |
| MAR [sd]                             | und ich würde sagen dass man dass wir auch eine Decke brauchen |
| MAR [a]                              | 1-für 2a-wol                                                   |
| RIC [v]                              |                                                                |
| RIC [sd]                             |                                                                |
| NOR [v]                              | und ein FEUerwerk,>                                            |
| NOR [sd]                             | Feuerwerk                                                      |
| NOR [a]                              |                                                                |

[13]

| 75 [00:44.4] |                                    | 76 [00:46.4]77 [00:46.5]78 [00:46.7]   |
|--------------|------------------------------------|----------------------------------------|
| MAR [v]      | brUUche,                           | DOCH gäll vAlerii.                     |
| MAR [sd]     |                                    | doch gell Valérie                      |
| MAR [nv]     |                                    | ((schaut zu VAL))                      |
| MAR [a]      |                                    | 2a-wol 4-meta 4-frage                  |
| RIC [v]      | NÄI (-) decki BRUUche mir nIt; °hh | ähm (-) nÄi döt uf                     |
| RIC [sd]     | nein Decke brauchen wir nicht      | ähm nein dort auf der                  |
| RIC [nv]     |                                    | ((zieht seinen Stuhl zum Tisch hin und |
| RIC [a]      | 1-geg 2a-wol                       | 2a-wol 3a-ab                           |

[14]

| 80 [00:48.4]81 [00:50.0*] |                                                                                             |
|---------------------------|---------------------------------------------------------------------------------------------|
| RIC [v]                   | de Insle (.) hets doch PALme. °h (.) und me STRANdet jo fascht Immer uf de °h äh            |
| RIC [sd]                  | Insel hat es doch Palmen und man strandet ja fast immer auf den auf den äh auf Inseln wo es |
| RIC [nv]                  | sitzt ab))                                                                                  |
| RIC [a]                   |                                                                                             |

[15]

| 82 [00:54.6] 83 [00:55.2] |                                                                     |
|---------------------------|---------------------------------------------------------------------|
| VAL [v]                   | hm_hm,                                                              |
| VAL [sd]                  | mhm                                                                 |
| RIC [v]                   | uf Insle wos pAlme hEt; und (-) und dötte hets jo PALmeblÄtter; und |
| RIC [sd]                  | Palmen hat und und dort hat es ja Palmenblätter und                 |
| RIC [nv]                  | ((spricht zu VAL))                                                  |
| RIC [a]                   |                                                                     |

[16]

|                 | 85 [00:59.6]                                   | 86 [01:00.2] | 87 [01:00.3]                          |
|-----------------|------------------------------------------------|--------------|---------------------------------------|
| <b>MAR [nv]</b> | <i>((runzelt die Stirn und schaut zu VAL))</i> |              |                                       |
| <b>RIC [v]</b>  | pAlmeblÄtter sind WARM.                        |              | wenn                                  |
| <b>RIC [sd]</b> | Palmenblätter sind warm                        |              | wenn sie                              |
| <b>RIC [nv]</b> |                                                |              |                                       |
| <b>RIC [a]</b>  |                                                |              |                                       |
| <b>NOR [nv]</b> |                                                |              | <i>((schaut kurz zu VAL und MAR))</i> |

[17]

|                 | 88 [01:01.2]                           | 89 [01:02.2*]90 [01:03.2*]91 [01:03.8]92 [01:04.0*]93 [01:04.3]94 [01:04.5] |
|-----------------|----------------------------------------|-----------------------------------------------------------------------------|
| <b>VAL [v]</b>  | jä das STIMMT;                         | hm_hm;                                                                      |
| <b>VAL [sd]</b> | ja das stimmt                          | mhm                                                                         |
| <b>VAL [a]</b>  | 4-meta                                 |                                                                             |
| <b>RIC [v]</b>  | sII ja °h am nOmitag in de SUNne sInd. | as(o) kA me jo                                                              |
| <b>RIC [sd]</b> | ja am Nachmittag in der Sonne sind     | als(o) kann man ja                                                          |
| <b>RIC [nv]</b> |                                        |                                                                             |
| <b>RIC [a]</b>  |                                        |                                                                             |
| <b>NOR [v]</b>  |                                        | äh verBAN(D),                                                               |
| <b>NOR [sd]</b> |                                        | äh Verband                                                                  |
| <b>NOR [nv]</b> |                                        | <i>((zeigt auf</i>                                                          |
| <b>NOR [a]</b>  |                                        | 1-für 2a-ver 4-frage                                                        |
| <b>[nv]</b>     |                                        | <i>(.)</i>                                                                  |

[18]

|                 | 95 [01:05.1*]96 [01:05.7] | 97 [01:07.3*]98 [01:08.0]                     | 99 [01:08.4]                  |
|-----------------|---------------------------|-----------------------------------------------|-------------------------------|
| <b>RIC [v]</b>  | DIE brUUche, °h           | s SACKmässer isch wIchtig- °h ähm (-) e TOPF, |                               |
| <b>RIC [sd]</b> | die brauchen              | das Sackmesser ist wichtig                    | ähm ein Topf                  |
| <b>RIC [nv]</b> |                           | <i>((zeigt auf Sackmesser))</i>               | <i>((zeigt auf Kochtopf))</i> |
| <b>RIC [a]</b>  |                           | 1-für 2a-sac 1-für 2a-koc 1-für 2a-han        |                               |
| <b>NOR [v]</b>  |                           |                                               |                               |
| <b>NOR [sd]</b> |                           |                                               |                               |
| <b>NOR [nv]</b> | Verbandszeug))            |                                               |                               |
| <b>NOR [a]</b>  |                           |                                               |                               |

[19]

|                 | 100 [01:09.1]101 [01:09.9] | 102 [01:10.2]103 [01:10.7]        | 104 [01:11.8]105 [01:12.8*]106 [01:13.9] |
|-----------------|----------------------------|-----------------------------------|------------------------------------------|
| <b>VAL [v]</b>  |                            |                                   | aber ricArdo mir hÄns scho °h            |
| <b>VAL [sd]</b> |                            |                                   | aber Ricardo wir haben es schon über     |
| <b>VAL [nv]</b> |                            |                                   | <i>((zeigt auf NOR))</i>                 |
| <b>VAL [a]</b>  |                            |                                   | 2a-han 3a-ab 4-meta                      |
| <b>MAR [v]</b>  |                            | Und e (-) und e verBAND?          |                                          |
| <b>MAR [sd]</b> |                            | und ein und ein Verband           |                                          |
| <b>MAR [nv]</b> |                            | <i>((zeigt auf Verbandszeug))</i> |                                          |
| <b>MAR [a]</b>  |                            | 1-für 2a-ver 4-frage              |                                          |
| <b>RIC [v]</b>  | (.) Und e Telefon;         |                                   |                                          |
| <b>RIC [sd]</b> | und ein Telefon            |                                   |                                          |
| <b>RIC [nv]</b> | <i>((zeigt auf Handy))</i> |                                   |                                          |
| <b>RIC [a]</b>  |                            |                                   |                                          |

[20]

| 107 [01:14.2]108 [01:15.4]109 [01:16.1] |                                                                              |
|-----------------------------------------|------------------------------------------------------------------------------|
| VAL [v]                                 | über d nOra mit em TELEfon ghA; uf dEren Äinsame Insle hets käi STROOM;      |
| VAL [sd]                                | die Nora mit dem Telefon gehabt auf dieser einsamen Insel hat's keinen Strom |
| VAL [nv]                                | ((zeigt auf Insel))                                                          |
| VAL [a]                                 |                                                                              |
| NOR [nv]                                | ((tippt kurz auf das Verbandszeug oder aufs Handy))                          |

[21]

| 110 [01:16.5]111 [01:17.4]112 [01:17.6*]113 [01:18.2]114 [01:18.8]115 [01:19.1*]116 [01:19.5]117 [01:20.4]118 [01:20.6] |                                          |
|-------------------------------------------------------------------------------------------------------------------------|------------------------------------------|
| VAL [v]                                                                                                                 |                                          |
| VAL [sd]                                                                                                                |                                          |
| VAL [nv]                                                                                                                |                                          |
| VAL [a]                                                                                                                 |                                          |
| MAR [v]                                                                                                                 | jä:- verBAND (.) brUUucht me villcht no; |
| MAR [sd]                                                                                                                | ja Verband braucht man vielleicht noch   |
| MAR [nv]                                                                                                                | ((zeigt auf Verbandszeug))               |
| MAR [a]                                                                                                                 | 1-für 2a-ver                             |
| RIC [v]                                                                                                                 | jo: DEMfall; nÄ:i (.)                    |
| RIC [sd]                                                                                                                | ja in diesem Fall nein                   |
| RIC [nv]                                                                                                                | ((steht auf, schüttelt den               |
| RIC [a]                                                                                                                 | 2a-ver 3a-                               |

[22]

| 119 [01:20.8]120 [01:21.2]121 [01:22.0]122 [01:25.0]123 [01:25.5] |                                                                     |
|-------------------------------------------------------------------|---------------------------------------------------------------------|
| VAL [v]                                                           | JÄ,                                                                 |
| VAL [sd]                                                          | ja                                                                  |
| MAR [v]                                                           | nÄ:i (.) verBAND au gäll?                                           |
| MAR [sd]                                                          | nein Verband auch gell                                              |
| MAR [nv]                                                          | ((zeigt auf Verbandszeug und wendet sich zu                         |
| MAR [a]                                                           | 2a-ver 3a-ab 4-frage                                                |
| RIC [v]                                                           | verBAND nIt; °h aber w (.) äh pAlmeblätter sin:d guet für (.) für   |
| RIC [sd]                                                          | Verband nicht aber w äh Palmenblätter sind gut für für Verletzungen |
| RIC [nv]                                                          | Kopf und bewegt den Zeigefinger verneinend hin und her))            |
| RIC [a]                                                           | ab                                                                  |

[23]

| .. 124 [01:26.5]125 [01:26.7*]126 [01:27.0*]127 [01:27.5*]128 [01:27.7] |                                                                 |
|-------------------------------------------------------------------------|-----------------------------------------------------------------|
| VAL [nv]                                                                | ((lehnt nach vorne um auf NORs Blatt zu sehen))                 |
| MAR [v]                                                                 |                                                                 |
| MAR [sd]                                                                |                                                                 |
| MAR [nv]                                                                | VAL))                                                           |
| MAR [a]                                                                 |                                                                 |
| RIC [v]                                                                 | verLETzige. DOCH,                                               |
| RIC [sd]                                                                | doch                                                            |
| RIC [a]                                                                 |                                                                 |
| NOR [v]                                                                 | Aber do drUff (.) Aber do drUff HETS käini pAlmeblÄtter; °h     |
| NOR [sd]                                                                | aber da drauf aber da drauf hat es keine Palmenblätter oder das |
| NOR [nv]                                                                | ((zeigt auf ihr Blatt))                                         |
| NOR [a]                                                                 | 2a-ver 3a-ab 4-meta 1-für 2a-                                   |

[24]

| ..130 [01:30.0]131 [01:30.3] 132 [01:31.2*]133 [01:33.3*]134 [01:33.7] |                                                                           |
|------------------------------------------------------------------------|---------------------------------------------------------------------------|
| MAR [v]                                                                | J:Ä::;                                                                    |
| MAR [sd]                                                               | ja                                                                        |
| RIC [v]                                                                | nÄ::i das                                                                 |
| RIC [sd]                                                               | nein das braucht                                                          |
| RIC [nv]                                                               | ((schüttelt leicht den                                                    |
| RIC [a]                                                                | 1-geg 2a-mos                                                              |
| NOR [v]                                                                | Oder dAs damit me nit chrAnk wird wä::g (-) de mUcke:?                    |
| NOR [sd]                                                               | damit man nicht krank wird wegen den Mücken                               |
| NOR [nv]                                                               | ((hält den andern ihr Blatt hin und zeigt und tippt auf das Moskitonetz)) |
| NOR [a]                                                                | mos 3a-in 3b-fin 4-nonverbal                                              |
| [nv]                                                                   | (-)                                                                       |

[25]

| .. 135 [01:34.1]136 [01:34.8*]137 [01:35.0]138 [01:35.6]139 [01:35.6] |                                                            |
|-----------------------------------------------------------------------|------------------------------------------------------------|
| VAL [v]                                                               | mh?mh; zÄlt cha me jo zUemache denn SINN käini             |
| VAL [sd]                                                              | nein Zelt kann man ja zumachen dann sind keine Mücken dort |
| VAL [nv]                                                              | ((zeigt auf Zelt))                                         |
| VAL [a]                                                               | 2a-zel 2a-mos 3a-ab                                        |
| RIC [v]                                                               | BRUUCHT me nit;                                            |
| RIC [sd]                                                              | man nicht                                                  |
| RIC [nv]                                                              | Kopf))                                                     |
| RIC [a]                                                               |                                                            |

|          | 140 [01:35.7]                                    | 141 [01:38.1] | 142 [01:38.5] | 143 [01:39.1*] |
|----------|--------------------------------------------------|---------------|---------------|----------------|
| VAL [v]  | mUcke dÖte,                                      |               |               |                |
| VAL [sd] |                                                  |               |               |                |
| VAL [a]  |                                                  |               |               |                |
| RIC [v]  | Oder wenn (.) wenn mer jetzt DAS do händ und     |               |               |                |
| RIC [sd] | oder wenn wenn wir jetzt das da haben und nichts |               |               |                |
| RIC [nv] | <i>((zeigt auf Verbandszeug))</i>                |               |               |                |
| RIC [a]  | 1-th 2a-ver 4-meta 4-frage                       |               |               |                |
| NOR [v]  | jö-                                              |               |               |                |
| NOR [sd] | ja                                               |               |               |                |
| [nv]     |                                                  | (--)          |               |                |

|                 |                             |                                                             |               |
|-----------------|-----------------------------|-------------------------------------------------------------|---------------|
|                 | 144 [01:42.1*]145 [01:42.6] | 146 [01:43.2*]147 [01:43.6]                                 | 148 [01:45.8] |
| <b>MAR [v]</b>  |                             | Ich wÜrd no schla                                           |               |
| <b>MAR [sd]</b> |                             | ich würde noch Schla Schlafsäcke                            |               |
| <b>MAR [nv]</b> |                             | ((zeigt auf Schlafsack))                                    |               |
| <b>MAR [a]</b>  |                             | 1-für 2a-sch                                                |               |
| <b>RIC [v]</b>  | nÜt?                        | mir KÖNNe au nUme- °h                                       |               |
| <b>RIC [sd]</b> |                             | wir können auch nur                                         | Schlafsack    |
| <b>RIC [nv]</b> |                             | ((macht mit der Hand eine suchende Bewegung auf dem Blatt)) |               |
| <b>RIC [a]</b>  |                             |                                                             | 2a-sch 3a-    |
| <b>[nv]</b>     | (-)                         |                                                             |               |

|                 | ..                            | 149 [01:46.5*] | 150 [01:47.2]                  | 151 [01:47.6]          | 152 [01:48.6] |
|-----------------|-------------------------------|----------------|--------------------------------|------------------------|---------------|
| <b>MAR [v]</b>  | SCHLOOFsäck (-) mItnee.       |                |                                | DOCH gäll valerii?     |               |
| <b>MAR [sd]</b> | mitnehmen                     |                |                                | doch gell Valérie      |               |
| <b>MAR [nv]</b> |                               |                |                                | ((schaut zu VAL))      |               |
| <b>MAR [a]</b>  |                               |                |                                | 2a-sch 3a-ab 4-meta 4- |               |
| <b>RIC [v]</b>  | schLOOfsack isch NIT wIchtig; |                | me ka uf em SAND schLOOfE;     |                        |               |
| <b>RIC [sd]</b> | ist nicht wichtig             |                | man kann auf dem Sand schlafen |                        |               |
| <b>RIC [a]</b>  | ab                            |                |                                |                        |               |

|                 |                                                                                                                          |              |
|-----------------|--------------------------------------------------------------------------------------------------------------------------|--------------|
|                 | 153 [01:49.1*]154 [01:49.8]155 [01:50.9]156 [01:51.0]157 [01:51.1*]158 [01:51.3]159 [01:51.8]160 [01:52.2*]161 [01:52.5] |              |
| <b>VAL [v]</b>  |                                                                                                                          | Jä,          |
| <b>VAL [sd]</b> |                                                                                                                          | ja           |
| <b>MAR [v]</b>  | dr sAnd BISST gäll.                                                                                                      |              |
| <b>MAR [sd]</b> | der Sand beisst/juckt gell                                                                                               |              |
| <b>MAR [nv]</b> | ((schaut zu NOR))                                                                                                        |              |
| <b>MAR [a]</b>  | frage                                                                                                                    |              |
| <b>RIC [v]</b>  |                                                                                                                          | NÄ::I;       |
| <b>RIC [sd]</b> |                                                                                                                          | nein         |
| <b>RIC [nv]</b> |                                                                                                                          | voll NIT     |
| <b>RIC [a]</b>  |                                                                                                                          | voll nicht   |
|                 |                                                                                                                          | ((macht eine |
|                 |                                                                                                                          | 2a-sch 3a-ab |
| <b>NOR [v]</b>  | näi,                                                                                                                     |              |
| <b>NOR [sd]</b> | nein                                                                                                                     |              |
| <b>NOR [nv]</b> |                                                                                                                          | ((nickt))    |
| <b>[nv]</b>     |                                                                                                                          | (-)          |



[30]

| ..       |                                                                       | 162 [01:56.0]               |
|----------|-----------------------------------------------------------------------|-----------------------------|
| MAR [v]  |                                                                       | Aber (-) Aber wemme         |
| MAR [sd] |                                                                       | aber aber wenn man dann am  |
| MAR [a]  |                                                                       | 2a-sch 3a-ab 3b-kond 4-quae |
| RIC [v]  | wEmme (.) wemme e jAcke und so äh <<leise> AAhet>;                    |                             |
| RIC [sd] | wenn man wenn man eine Jacke und so äh anhat                          |                             |
| RIC [nv] | <i>Bewegung, als würde er sich eine Kapuze über den Kopf ziehen))</i> |                             |
| RIC [a]  | 4-quae                                                                |                             |

[31]

| ..       |                                                                      | 163 [01:58.4]164 [02:00.2]            | 165 [02:00.8*] |
|----------|----------------------------------------------------------------------|---------------------------------------|----------------|
| MAR [v]  | denn am mOrge vilicht UFstoot, denn het me Alles SAND im (.) im sIm, |                                       |                |
| MAR [sd] | Morgen vielleicht aufsteht                                           | dann hat man alles Sand im im seinem  |                |
| MAR [a]  |                                                                      |                                       |                |
| RIC [v]  |                                                                      | <<laut und genervt> me kA jo BA:dÄ::> |                |
| RIC [sd] |                                                                      | man kann ja baden                     |                |
| RIC [nv] |                                                                      | <i>((zu MAR geneigt))</i>             |                |
| RIC [a]  |                                                                      | 2a-sch 3a-ab 4-quae                   |                |

[32]

| 166 [02:01.7]167 [02:01.8] |                                                    | 168 [02:02.6*]169 [02:03.8]          |
|----------------------------|----------------------------------------------------|--------------------------------------|
| VAL [v]                    | jÄ (.) s het jo e rIIsgs MEER, (-) <<lachend> hh°> |                                      |
| VAL [sd]                   | ja es hat ja ein riesiges Meer                     |                                      |
| VAL [a]                    | 2a-sch 3a-zu 4-quae                                |                                      |
| MAR [v]                    |                                                    | ICH würd das nId mache in            |
| MAR [sd]                   |                                                    | ich würde das nicht machen in diesem |
| MAR [a]                    |                                                    | 2a-sch 3a-ab 4-quae                  |
| NOR [v]                    | ou;                                                |                                      |
| NOR [sd]                   | oh                                                 |                                      |

[33]

| ..       |                    | 170 [02:06.3*]171 [02:08.1]        | 172 [02:09.1*]                          |
|----------|--------------------|------------------------------------|-----------------------------------------|
| MAR [v]  | däm sAlz(e)wAsser, |                                    |                                         |
| MAR [sd] | Salz(e)wasser      |                                    |                                         |
| MAR [a]  |                    |                                    |                                         |
| RIC [v]  |                    | jo UND?                            | °h HÄle (-) hEts jo dO bim              |
| RIC [sd] |                    | ja und                             | Haie hat's ja da beim Blauen Hellblauen |
| RIC [nv] |                    | <i>((zuckt mit den Schultern))</i> |                                         |
| RIC [a]  |                    | 2a-sch 3a-ab 4-quae                |                                         |
| [nv]     | (1.7)              |                                    |                                         |

[34]

| 173 [02:10.2]174 [02:12.9] |                                                       | 175 [02:14.7*]                          |
|----------------------------|-------------------------------------------------------|-----------------------------------------|
| MAR [v]                    |                                                       | hÄie HETS do (.) (grAd/gAr)             |
| MAR [sd]                   |                                                       | Haie hat es da (gerade/gar) nicht drauf |
| MAR [nv]                   |                                                       | ((beugt sich ganz nah über ihr Blatt))  |
| MAR [a]                    |                                                       | 2a-sch 4-quae 4-meta                    |
| RIC [v]                    | blAue (.) hEllblaue nit, °h (.) die CHÖme nit bis dO, |                                         |
| RIC [sd]                   | nicht                                                 | die kommen nicht bis da                 |
| RIC [nv]                   |                                                       | ((zeigt auf das Meer auf VALs Blatt))   |
| RIC [a]                    |                                                       |                                         |

[35]

| 176 [02:16.5] |                       | 177 [02:17.0]                                         | 178 [02:18.5]                            |
|---------------|-----------------------|-------------------------------------------------------|------------------------------------------|
| MAR [v]       | nit druff;            |                                                       |                                          |
| MAR [sd]      |                       |                                                       |                                          |
| MAR [nv]      | ((schaut zu RIC auf)) |                                                       |                                          |
| MAR [a]       |                       |                                                       |                                          |
| RIC [v]       |                       | jo hÄie GITS scho, °h äh °h die sIn °h die chÖme aber |                                          |
| RIC [sd]      |                       | ja Haie gibt es schon                                 | äh die sind die kommen aber nicht bis da |
| RIC [nv]      |                       |                                                       | ((zeigt auf das Meer auf MAR Blatt))     |
| RIC [a]       |                       | 2a-sch 3a-ab 4-quae                                   |                                          |

[36]

| 179 [02:22.0*]180 [02:23.8]181 [02:27.1] |                                                     |
|------------------------------------------|-----------------------------------------------------|
| RIC [v]                                  | NIT bis dO zum hEllbla:ue-                          |
| RIC [sd]                                 | zum Hellblauen                                      |
| RIC [nv]                                 |                                                     |
| RIC [a]                                  |                                                     |
| [nv]                                     |                                                     |
|                                          | s WICHtigscht °h äh wo s (.) brUUcht (.)            |
|                                          | das Wichtigste äh das es braucht ist das Sackmesser |
|                                          | ((tippt auf Sackmesser))                            |
|                                          | 1-für 2a-sac 3a-in                                  |
|                                          | (1.8)                                               |

[37]

| 182 [02:27.6]183 [02:27.9*]184 [02:28.2] |                                                                       |
|------------------------------------------|-----------------------------------------------------------------------|
| RIC [v]                                  | isch (.) s !SACK!mässer. °h s SACKmässer brUUcht me zum (-) °h d bÄum |
| RIC [sd]                                 | das Sackmesser braucht man um die Bäume abzusägen                     |
| RIC [nv]                                 | ((tippt zweimal auf Sackmesser))                                      |
| RIC [a]                                  |                                                                       |

[38]

|          | 185 [02:29.7]                            | 186 [02:31.3] | 187 [02:33.4] | 188 [02:34.3] | 189 [02:34.7] |
|----------|------------------------------------------|---------------|---------------|---------------|---------------|
| VAL [v]  | jä SACKmässer                            |               |               |               |               |
| VAL [sd] | ja Sackmesser braucht man                |               |               |               |               |
| VAL [a]  | 2a-sac 3a-zu                             |               |               |               |               |
| MAR [v]  | °h Aber me bruucht (.) schlO-            |               |               |               |               |
| MAR [sd] | aber man braucht Schla                   |               |               |               |               |
| MAR [nv] | ((zeigt auf Schlafsack))                 |               |               |               |               |
| MAR [a]  | 1-für 2a-sch 4-meta                      |               |               |               |               |
| RIC [v]  | absÄÄge, °h und denn kA me e FLOSS bAue; |               |               |               |               |
| RIC [sd] | und dann kann man ein Floss bauen        |               |               |               |               |
| RIC [a]  |                                          |               |               |               |               |

[39]

|          | 190 [02:35.3]                                                    | 191 [02:35.9] | 192 [02:36.4*] | 193 [02:38.8] |
|----------|------------------------------------------------------------------|---------------|----------------|---------------|
| VAL [v]  | brUUcht me ganz slcher.                                          |               |                |               |
| VAL [sd] | ganz sicher                                                      |               |                |               |
| VAL [nv] | ((tippt auf Sackmesser))                                         |               |                |               |
| VAL [a]  |                                                                  |               |                |               |
| MAR [v]  | ICH würd ä schlOOfsack mitnee wenn ich (.) wenn ich DII wär.     |               |                |               |
| MAR [sd] | ich würde einen Schlafsack mitnehmen wenn ich wenn ich dich wäre |               |                |               |
| MAR [nv] | ((schaut zu                                                      |               |                |               |
| MAR [a]  |                                                                  |               |                |               |

[40]

|          | 194 [02:39.1*]                             | 195 [02:39.5*] | 196 [02:41.8*] | 197 [02:42.3] | 198 [02:42.7] |
|----------|--------------------------------------------|----------------|----------------|---------------|---------------|
| VAL [v]  | aso e ZÄLT und ä sAckmässer                |                |                |               |               |
| VAL [sd] | also ein Zelt und ein Sackmesser haben wir |                |                |               |               |
| VAL [nv] | ((zeigt auf Zelt und auf Sackmesser))      |                |                |               |               |
| VAL [a]  | 1-th 2a-zel 1-th 2a-sac 4-meta             |                |                |               |               |
| MAR [nv] | RIC))                                      |                |                |               |               |
| RIC [v]  | schlOOfsack nit NÖtig; °h                  |                |                |               |               |
| RIC [sd] | Schlafsack nicht nötig                     |                |                |               |               |
| RIC [a]  | 1-geg 2a-sch                               |                |                |               |               |
| [nv]     | (-)                                        |                |                |               |               |

[41]

| .. 199 [02:43.7]200 [02:44.9*]201 [02:45.3]202 [02:45.4]203 [02:45.8]204 [02:46.3]205 [02:46.7] |                                        |
|-------------------------------------------------------------------------------------------------|----------------------------------------|
| VAL [v]                                                                                         | hÄmmer jetzt;                          |
| VAL [sd]                                                                                        | jetzt                                  |
| VAL [nv]                                                                                        |                                        |
| VAL [a]                                                                                         |                                        |
| MAR [v]                                                                                         | (jo und) SCHLOOFsack;                  |
| MAR [sd]                                                                                        | ja und Schlafsack                      |
| MAR [a]                                                                                         | 1-th 2a-sch                            |
| RIC [v]                                                                                         | <<laut und genervt> nÄ:i zÄlt isch (.) |
| RIC [sd]                                                                                        | nein Zelt ist unnötig                  |
| RIC [nv]                                                                                        | ((sitzt ab)) ((schlägt auf den Tisch)) |
| RIC [a]                                                                                         | 1-geg 2a-zel 4-meta                    |
| [nv]                                                                                            | (-)                                    |

[42]

| 206 [02:47.2] 207 [02:48.0]208 [02:48.1*]209 [02:49.1]210 [02:49.4*]211 [02:50.2]212 [02:50.3] 213 [02:51.3*] |                                          |
|---------------------------------------------------------------------------------------------------------------|------------------------------------------|
| MAR [v]                                                                                                       | NÄ::I::; nÄ:i (.) e zÄlt isch SUpEr; zum |
| MAR [sd]                                                                                                      | nein nein ein Zelt ist super zum         |
| MAR [a]                                                                                                       | 1-für 2a-zel 3a-ab                       |
| RIC [v]                                                                                                       | !UN:NÖ::TIG!-> UNnötig; UNnötig;         |
| RIC [sd]                                                                                                      | unnötig unnötig                          |
| RIC [a]                                                                                                       |                                          |
| NOR [v]                                                                                                       | nä:ä:i;                                  |
| NOR [sd]                                                                                                      | nein                                     |
| NOR [nv]                                                                                                      | ((dreht sich zu RIC um))                 |

[43]

| ..215 [02:53.1] 216 [02:54.5*] 217 [02:55.5] 218 [02:56.3*]219 [02:57.3] |                                                            |
|--------------------------------------------------------------------------|------------------------------------------------------------|
| MAR [v]                                                                  | SCHLOOfe denn het mes wEnigstEnts (-) e bitz bequE::m. °hh |
| MAR [sd]                                                                 | Schlafen dann hat man es wenigstens ein bisschen bequem ja |
| MAR [a]                                                                  |                                                            |
| RIC [v]                                                                  | !UN!nötig-                                                 |
| RIC [sd]                                                                 | unnötig                                                    |
| RIC [a]                                                                  |                                                            |
| NOR [v]                                                                  | und was Isch wenns RÄ:Gnet?                                |
| NOR [sd]                                                                 | und was ist wenn es regnet                                 |
| NOR [nv]                                                                 | ((zu RIC und MAR))                                         |
| NOR [a]                                                                  | 2a-sch 3a-ab 4-frage                                       |

[44]

|          | 220 [02:57.5]221 [02:57.8]222 [02:58.3]223 [02:58.7]224 [02:59.3] | 225 [03:00.3]226 [03:02.5]                  |
|----------|-------------------------------------------------------------------|---------------------------------------------|
| VAL [v]  | (Ebe,)                                                            |                                             |
| VAL [sd] | (eben)                                                            |                                             |
| MAR [v]  | JÄ::?                                                             | was isch wenss RÄGnet?= denn hÄmmer         |
| MAR [sd] |                                                                   | was ist wenn es regnet dann haben wir keine |
| MAR [a]  |                                                                   | 2a-sch 2a-wol 3a-ab 4-frage                 |
| RIC [v]  | s muess nlt beQUEEM sii;                                          |                                             |
| RIC [sd] | es muss nicht bequem sein                                         |                                             |
| RIC [nv] | ((schüttelt den Kopf))                                            | ((lehnt zu                                  |
| RIC [a]  | 2a-sch 3a-ab                                                      |                                             |

[45]

|          | 227 [03:02.7]                               | 228 [03:02.8]229 [03:03.7*]230 [03:04.0] |
|----------|---------------------------------------------|------------------------------------------|
| MAR [v]  | käi SCHLOOFseck (.) käi dEcki und gAAr nüt, |                                          |
| MAR [sd] | Schlafsäcke keine Decke und gar nichts      |                                          |
| MAR [a]  |                                             |                                          |
| RIC [v]  | PALmeblätter,                               | (.) Unter de                             |
| RIC [sd] | Palmenblätter                               | unter den Palmenblättern                 |
| RIC [nv] | MAR))                                       |                                          |
| RIC [a]  | 2a-sch 2a-wol 3a-ab                         |                                          |

[46]

|          | 231 [03:05.8]232 [03:06.2]233 [03:06.9*]234 [03:07.5] | 235 [03:08.0]236 [03:08.3*] |
|----------|-------------------------------------------------------|-----------------------------|
| MAR [v]  | die wÄrde NASS,                                       |                             |
| MAR [sd] | die werden nass                                       |                             |
| MAR [a]  | 2a-sch 2a-wol 3a-ab 4-quae                            |                             |
| RIC [v]  | pAlmeBLÄTter;                                         | <<laut> U::u:nd.>           |
| RIC [sd] |                                                       | und                         |
| RIC [nv] |                                                       | ((spricht zu NOR))          |
| RIC [a]  |                                                       |                             |
| NOR [v]  | <<laut> aber dO hets käini PALmeblÄtter dru:ff;>      |                             |
| NOR [sd] | aber da hat es keine Palmenblätter drauf              |                             |
| NOR [nv] | ((zeigt auf RICs Blatt))                              |                             |
| NOR [a]  | 2a-sch 2a-wol 3a-ab 4-meta 4-quae                     |                             |

[47]

|          | 237 [03:09.4*]238 [03:10.0]239 [03:10.3]     | 240 [03:11.3] | 241 [03:12.1]242 [03:12.8]243 [03:12.9] |
|----------|----------------------------------------------|---------------|-----------------------------------------|
| RIC [v]  | <<laut> U::u:nd.>                            |               | <<laut>                                 |
| RIC [sd] | und                                          |               | dann                                    |
| RIC [nv] | ((spricht zu NOR))                           |               | ((zeigt auf                             |
| RIC [a]  |                                              |               | 1-für 2a-                               |
| NOR [v]  | mir müen Öppis (AAnemache vo do),            |               | wo do DRUFF sin;                        |
| NOR [sd] | wir müssen etwas (hintun von da)             |               | die da drauf sind                       |
| NOR [nv] | ((zeigt auf die Gegenstände auf RICs Blatt)) |               | ((zeigt erneut auf die                  |
| NOR [a]  | 4-norm 4-meta                                |               |                                         |
| [nv]     | (--)                                         |               | (--)                                    |

[48]

| 245 [03:13.8]246 [03:14.9] |                                                                     |
|----------------------------|---------------------------------------------------------------------|
| <b>RIC [v]</b>             | denn nÄmmer halt (.) nUme DAS do;> °h denn kA me °h (.) uf me PALme |
| <b>RIC [sd]</b>            | nehmen wir halt nur das da dann kann man auf eine Palme machen      |
| <b>RIC [nv]</b>            | die Wolldecke))                                                     |
| <b>RIC [a]</b>             | wol 3a-in 4-nonverbal                                               |
| <b>NOR [v]</b>             |                                                                     |
| <b>NOR [sd]</b>            |                                                                     |
| <b>NOR [nv]</b>            | Gegenstände auf RICs Blatt))                                        |
| <b>NOR [a]</b>             |                                                                     |

[49]

| 247 [03:17.1]248 [03:17.4]249 [03:18.3] |                                                              |
|-----------------------------------------|--------------------------------------------------------------|
| <b>MAR [v]</b>                          | NÄ::I;                                                       |
| <b>MAR [sd]</b>                         | nein                                                         |
| <b>RIC [v]</b>                          | mAche;                                                       |
| <b>RIC [sd]</b>                         |                                                              |
| <b>RIC [a]</b>                          |                                                              |
| <b>NOR [v]</b>                          | un wAsch wemme sich WÄLZT und nOchäde keit men               |
| <b>NOR [sd]</b>                         | und was ist wenn man sich wälzt und nachher fällt man runter |
| <b>NOR [a]</b>                          | 2a-wol 3a-ab 4-frage                                         |
| <b>[nv]</b>                             | (-)                                                          |

[50]

| 250 [03:20.6]251 [03:20.7]252 [03:21.0]253 [03:21.2*]254 [03:21.3]255 [03:21.4]256 [03:21.7*] |                     |  |                             |
|-----------------------------------------------------------------------------------------------|---------------------|--|-----------------------------|
| VAL [v]                                                                                       | hehe °h             |  |                             |
| VAL [sd]                                                                                      | hehe                |  |                             |
| MAR [v]                                                                                       | JÄ:?                |  |                             |
| MAR [sd]                                                                                      | ja                  |  |                             |
| RIC [v]                                                                                       | NÄ:I-               |  | nIt (-) zum druff (-)°h     |
| RIC [sd]                                                                                      | nein                |  | nicht um drauf zu hocken    |
| RIC [nv]                                                                                      |                     |  | ((zeigt auf die Wolldecke)) |
| RIC [a]                                                                                       | 2a-wol 3a-ab 4-quae |  |                             |
| NOR [v]                                                                                       | AAbe:?              |  |                             |
| NOR [sd]                                                                                      |                     |  |                             |
| NOR [a]                                                                                       |                     |  |                             |

[51]

| .. 257 [03:24.4]258 [03:26.6] 259 [03:27.4]260 [03:27.5]261 [03:27.6] 262 [03:28.3]263 [03:28.8*] |                                                                          |
|---------------------------------------------------------------------------------------------------|--------------------------------------------------------------------------|
| MAR [v]                                                                                           | vAlerii wÜrdisch du SCHLOOFseck mltnee.                                  |
| MAR [sd]                                                                                          | Valérie würdest du Schlafsäcke mitnehmen                                 |
| MAR [nv]                                                                                          | ((zeigt auf ihr Blatt))                                                  |
| MAR [a]                                                                                           | 2a-sch 4-meta 4-frage                                                    |
| RIC [v]                                                                                           | HO:cke, zum UN:terem (-) h° äh:: (xxx xxx)                               |
| RIC [sd]                                                                                          | um unter dem äh (xxx xxx)                                                |
| RIC [nv]                                                                                          |                                                                          |
| RIC [a]                                                                                           | <<laut> iir<br>ihr begreift einsame<br>((verstärkt das Gesagte<br>4-meta |

[52]

| 264 [03:29.4] 265 [03:29.9*]266 [03:31.7]267 [03:32.4]268 [03:32.7]269 [03:33.9] |                                                                                           |
|----------------------------------------------------------------------------------|-------------------------------------------------------------------------------------------|
| VAL [v]                                                                          | JÄ,                                                                                       |
| VAL [sd]                                                                         | ja                                                                                        |
| MAR [v]                                                                          | mi (.) am (.) a ähm-                                                                      |
| MAR [sd]                                                                         | mi am a ähm                                                                               |
| MAR [nv]                                                                         | ((zeigt auf NOR))                                                                         |
| RIC [v]                                                                          | begriffet (-) ÄINsami Insle nit.> ich wü (-) ich WÜNSCHT ich wEr                          |
| RIC [sd]                                                                         | Insel nicht ich wü ich wünschte ich wäre alleine he                                       |
| RIC [nv]                                                                         | durch Auf- und Abwärtsbewegung mit den Händen)) ((sinkt zurück in seinen Stuhl und schaut |
| RIC [a]                                                                          |                                                                                           |

[53]

| .. 270 [03:34.5]271 [03:35.1*] 272 [03:35.9]273 [03:36.2]274 [03:36.3] 275 [03:37.0]276 [03:37.2] |                                              |
|---------------------------------------------------------------------------------------------------|----------------------------------------------|
| VAL [v]                                                                                           | und e                                        |
| VAL [sd]                                                                                          | und ein                                      |
| VAL [a]                                                                                           | 1-für 2a-                                    |
| MAR [v]                                                                                           | wÜrdsch du (.) SCHLOOFseck mltnee. ich AU-   |
| MAR [sd]                                                                                          | würdest du Schlafsäcke mitnehmen ich auch    |
| MAR [nv]                                                                                          |                                              |
| MAR [a]                                                                                           | 2a-sch 4-meta 4-frage 1-für 2a-sch           |
| RIC [v]                                                                                           | elÄi:ge he:.                                 |
| RIC [sd]                                                                                          |                                              |
| RIC [nv]                                                                                          | auf sein Blatt)) ((zuckt mit den Schultern)) |
| RIC [a]                                                                                           |                                              |
| NOR [nv]                                                                                          | ((nickt))                                    |

[54]

|          | 277 [03:37.2]278 [03:37.4]279 [03:37.4] | 280 [03:38.0]                                 | 281 [03:38.6] |
|----------|-----------------------------------------|-----------------------------------------------|---------------|
| VAL [v]  | ZÄLT,                                   | also sch SCHLOOFseck und zÄlt hÄmmer jetzte.  |               |
| VAL [sd] | Zelt                                    | also Sch Schlafsäcke und Zelt haben wir jetzt |               |
| VAL [nv] |                                         | ((zeigt auf Zelt)) ((zeigt auf Schlafsack))   |               |
| VAL [a]  | zel                                     | 1-th 2a-zel 1-th 2a-sch 4-meta                |               |
| RIC [v]  | (ich nit)                               |                                               |               |
| RIC [sd] | (ich nicht)                             |                                               |               |
| RIC [nv] |                                         |                                               |               |
| RIC [a]  | 1-geg 2a-sch                            |                                               |               |

[55]

|          | 282 [03:40.4*]                          | 283 [03:41.1]284 [03:41.8*]285 [03:42.4] |
|----------|-----------------------------------------|------------------------------------------|
| VAL [v]  |                                         | OU denn hÄmmer jo scho Alles;            |
| VAL [sd] |                                         | oh dann haben wir ja schon alles         |
| VAL [a]  |                                         | 4-meta                                   |
| NOR [v]  | und e SACKmÄsser-                       |                                          |
| NOR [sd] | und ein Sackmesser                      |                                          |
| NOR [nv] | ((zeigt auf Sackmesser auf VALs Blatt)) |                                          |
| NOR [a]  | 1-th 2a-sac 4-meta                      |                                          |
| [nv]     |                                         | (--)                                     |

[56]

|          | 286 [03:43.5]                    | 287 [03:44.6]288 [03:45.0*]                     | 289 [03:46.1] |
|----------|----------------------------------|-------------------------------------------------|---------------|
| VAL [v]  | aso WULLdecki brUUcht me nIt;    |                                                 |               |
| VAL [sd] | also Wolldecke braucht man nicht |                                                 |               |
| VAL [nv] | ((zeigt auf Wolldecke))          |                                                 |               |
| VAL [a]  | 1-geg 2a-wol                     |                                                 |               |
| RIC [v]  |                                  | ä:h (.) ÄIgentlich brÜÜcht mer s                |               |
| RIC [sd] |                                  | äh eigentlich bräuchten wir das                 |               |
| RIC [nv] |                                  | ((rutscht nach vorne zum Tisch und zeigt zuerst |               |
| RIC [a]  |                                  | 1-th 2a-sac 1-th 2a-str 1-th 2a-koc 4-          |               |
| [nv]     |                                  | ((alle schauen zu VAL))                         |               |

[57]

|          | 290 [03:49.4]                                            | 291 [03:49.7*]      | 292 [03:50.1] | 293 [03:50.3] | 294 [03:50.6*] |
|----------|----------------------------------------------------------|---------------------|---------------|---------------|----------------|
| VAL [v]  | wIsoo                                                    |                     |               |               |                |
| VAL [sd] | wieso braucht                                            |                     |               |               |                |
| VAL [a]  | 2a-koc 3a-ab 4-                                          |                     |               |               |                |
| MAR [v]  | NÄ::Ä:I;                                                 |                     |               |               |                |
| MAR [sd] | nein                                                     |                     |               |               |                |
| RIC [v]  | sAckmässer (.) dA:s und dA:s.                            | DOCH (-) zUm kOche; |               |               |                |
| RIC [sd] | Sackmesser das und das                                   | doch zum Kochen     |               |               |                |
| RIC [nv] | aufSackmesser, dann aufStreichhölzer, dann aufKochtopf)) |                     |               | ((zeigt auf   |                |
| RIC [a]  | meta 4-nonverbal                                         |                     |               | 2a-koc 3a-ab  |                |



[58]

| ..       |                          | 295 [03:51.7*] | 296 [03:52.6] | 297 [03:53.5]                                         |
|----------|--------------------------|----------------|---------------|-------------------------------------------------------|
| VAL [v]  | brUUcht men e CHOCHtopf; |                |               |                                                       |
| VAL [sd] | man einen Kochtopf       |                |               |                                                       |
| VAL [a]  | frage 4-meta             |                |               |                                                       |
| MAR [v]  |                          |                |               | das HETS aber nit do drUff,                           |
| MAR [sd] |                          |                |               | das hat es aber nicht da drauf                        |
| MAR [nv] |                          |                |               | ((zeigt auf die Gegenstände auf dem Blatt und schlägt |
| MAR [a]  |                          |                |               | 2a-koc 3a-ab 4-meta                                   |
| RIC [v]  |                          |                | zum CHOche;   |                                                       |
| RIC [sd] |                          |                | zum Kochen    |                                                       |
| RIC [nv] | Kochtopf))               |                |               |                                                       |
| RIC [a]  |                          |                | 2a-koc 3a-ab  |                                                       |

[59]

| ..       |                                 | 298 [03:54.7*] | 299 [03:55.8] | 300 [03:56.2] | 301 [03:57.2]              | 302 [03:58.2]                  | 303 [03:59.4] |
|----------|---------------------------------|----------------|---------------|---------------|----------------------------|--------------------------------|---------------|
| VAL [v]  |                                 |                |               |               |                            | es het nId emoll e             |               |
| VAL [sd] |                                 |                |               |               |                            | es hat nicht einmal einen Herd |               |
| VAL [nv] |                                 |                |               |               |                            | ((zeigt auf Blatt))            |               |
| VAL [a]  |                                 |                |               |               |                            | 2a-koc 3a-ab                   |               |
| MAR [v]  |                                 |                |               |               |                            |                                | döt           |
| MAR [sd] |                                 |                |               |               |                            |                                | dort hat      |
| MAR [nv] | mehrmals hintereinander drauf)) |                |               |               |                            |                                |               |
| MAR [a]  |                                 |                |               |               |                            |                                |               |
| RIC [v]  |                                 |                |               |               | do:::-                     |                                |               |
| RIC [sd] |                                 |                |               |               | da                         |                                |               |
| RIC [nv] |                                 |                |               |               | ((zeigt auf den Kochtopf)) |                                |               |
| NOR [v]  |                                 |                |               | DOCH,         |                            |                                |               |
| NOR [sd] |                                 |                |               | doch          |                            |                                |               |
| [nv]     |                                 |                | (-)           |               |                            |                                |               |

[60]

| ..       |                                  | 305 [03:59.9] | 306 [03:59.9] | 307 [04:00.2] | 308 [04:00.5*]    | 309 [04:00.9]                 | 310 [04:01.5] |
|----------|----------------------------------|---------------|---------------|---------------|-------------------|-------------------------------|---------------|
| VAL [v]  | HÄRD wo me cha chOche.           |               |               |               |                   |                               |               |
| VAL [sd] | wo man kochen kann               |               |               |               |                   |                               |               |
| VAL [nv] |                                  |               |               |               |                   |                               |               |
| VAL [a]  |                                  |               |               |               |                   |                               |               |
| MAR [v]  | hEts (-) döt HETS jo:;           |               |               |               |                   |                               |               |
| MAR [sd] | es dort hat es ja                |               |               |               |                   |                               |               |
| RIC [v]  |                                  |               |               |               | u:u:nd;           | <<laut> FÜÜR chA me           |               |
| RIC [sd] |                                  |               |               |               | und               | Feuer kann man machen         |               |
| RIC [nv] | ((sinkt zurück in seinen Stuhl)) |               |               |               | ((schaut zu VAL)) |                               |               |
| RIC [a]  |                                  |               |               |               |                   | 2a-sac 2a-koc 2a-feu 3a-ab 4- |               |

[61]

| .. 311 [04:03.2*]312 [04:03.9]313 [04:04.4]314 [04:04.9]315 [04:05.6] |           |            |                                                           |
|-----------------------------------------------------------------------|-----------|------------|-----------------------------------------------------------|
| MAR [v]                                                               |           |            | me chA au wÜrschtli Ame(ne) STÄcke dra                    |
| MAR [sd]                                                              |           |            | man kann auch Würstchen am einem Stecken dran machen      |
| MAR [nv]                                                              |           |            | ((hält die Hände so, als halte sie einen Holzstock in     |
| MAR [a]                                                               |           |            | 3a-zu 4-meta 4-frage                                      |
| RIC [v]                                                               | mAche.>   | oh: (.) °h | <<schreiend> BÄUM felle->                                 |
| RIC [sd]                                                              |           | oh         | Bäume fällen                                              |
| RIC [nv]                                                              |           |            | ((beugt sich wieder nach vorne und zeigt auf Sackmesser)) |
| RIC [a]                                                               | nonverbal |            |                                                           |
| [nv]                                                                  | (--)      |            |                                                           |

[62]

| .. 317 [04:07.0] |                              | 318 [04:07.7]319 [04:08.1*]320 [04:08.2] |                                                            |
|------------------|------------------------------|------------------------------------------|------------------------------------------------------------|
| MAR [v]          | mAche,=gäll?                 |                                          | und denn tsch: GÄLL?                                       |
| MAR [sd]         | gell                         |                                          | und dann tsch gell                                         |
| MAR [nv]         | der Hand und schaut zu VAL)) |                                          | ((hält den imaginären Holzstock über ein imaginäres Feuer, |
| MAR [a]          |                              |                                          |                                                            |
| RIC [v]          | <<schreiend> HOLZ nee->      | <<schreiend> AA:füüre->                  |                                                            |
| RIC [sd]         | Holz nehmen                  | anfeuern                                 |                                                            |
| RIC [nv]         | ((zeigt auf Kochtopf))       | ((zeigt auf Feuerzeug))                  |                                                            |
| RIC [a]          |                              |                                          |                                                            |

[63]

| .. 321 [04:09.4] |                                      | 322 [04:09.7]            | 323 [04:11.0*]324 [04:11.1*] |
|------------------|--------------------------------------|--------------------------|------------------------------|
| MAR [v]          |                                      |                          | und (-) ZÄ:LT;               |
| MAR [sd]         |                                      |                          | und Zelt                     |
| MAR [nv]         | schaut zu VAL))                      |                          | ((zeigt auf                  |
| MAR [a]          |                                      |                          | 1-th 2a-zel 4-meta           |
| RIC [v]          |                                      | <<laut> KOCHdopf drUff;> |                              |
| RIC [sd]         |                                      | Kochtopf drauf           |                              |
| RIC [nv]         | ((haut mit der Faust auf den Tisch)) |                          |                              |
| RIC [a]          |                                      |                          |                              |

[64]

| ..              | 326 [04:11.4]327 [04:11.6]328 [04:12.4] | 329 [04:12.9]330 [04:13.1]331 [04:13.5*]332 [04:14.0] |
|-----------------|-----------------------------------------|-------------------------------------------------------|
| <b>MAR [v]</b>  | und-                                    | WOLLdecke und-                                        |
| <b>MAR [sd]</b> | und                                     | Wolldecke und                                         |
| <b>MAR [nv]</b> | das Zelt))                              | ((zeigt auf Wolldecke))                               |
| <b>MAR [a]</b>  |                                         | 1-th 2a-wol 1-th 2a-                                  |
| <b>RIC [v]</b>  | <<laut> OH: ihr beGRIFfet nÜ:t.>        | ich                                                   |
| <b>RIC [sd]</b> | oh ihr begreift nichts                  | ich                                                   |
| <b>RIC [nv]</b> | ((verwirft die Hand und steht auf))     | ((läuft in die eine Ecke des Zimmers))                |
| <b>RIC [a]</b>  | 4-meta                                  |                                                       |

[65]

| 333 [04:14.6]   | 334 [04:14.8]335 [04:14.9]336 [04:15.0]337 [04:15.2]338 [04:15.6]339 [04:16.2*] |
|-----------------|---------------------------------------------------------------------------------|
| <b>VAL [nv]</b> | ((schaut RIC nach))                                                             |
| <b>MAR [v]</b>  | SCH:LAAFsack;                                                                   |
| <b>MAR [sd]</b> | Schlafsack                                                                      |
| <b>MAR [nv]</b> | ((tippt auf Schlafsack))                                                        |
| <b>MAR [a]</b>  | sch 4-meta                                                                      |
| <b>RIC [v]</b>  | wÜnscht ich HETT euch nIt.                                                      |
| <b>RIC [sd]</b> | wünschte ich hätte euch nicht                                                   |
| <b>RIC [nv]</b> |                                                                                 |
| <b>RIC [a]</b>  |                                                                                 |
| <b>NOR [nv]</b> | ((schaut RIC nach))                                                             |
|                 | ihr sind                                                                        |
|                 | ihr seid so                                                                     |
|                 | 4-meta                                                                          |

[66]

| ..              | 341 [04:18.1*]                        | 342 [04:20.2]           | 343 [04:21.0]                   |
|-----------------|---------------------------------------|-------------------------|---------------------------------|
| <b>MAR [v]</b>  |                                       |                         | wÄmmers IIne go SÄge?           |
| <b>MAR [sd]</b> |                                       |                         | wollen wir es ihnen sagen gehen |
| <b>MAR [nv]</b> |                                       |                         | ((wendet sich zu VAL))          |
| <b>MAR [a]</b>  |                                       |                         | 4-meta 4-frage                  |
| <b>RIC [v]</b>  | sO (BAla)-                            |                         |                                 |
| <b>RIC [sd]</b> | (bala)                                |                         |                                 |
| <b>RIC [nv]</b> | ((versteckt sich hinter dem Vorhang)) |                         |                                 |
| <b>RIC [a]</b>  |                                       |                         |                                 |
| <b>[nv]</b>     |                                       | ((alle schauen zu RIC)) |                                 |

[67]

|          | 344 [04:22.5*]345 [04:23.4]    | 346 [04:24.5*]347 [04:25.6]348 [04:25.7]349 [04:25.9] |
|----------|--------------------------------|-------------------------------------------------------|
| VAL [v]  | jä mir sin <<lächelnd> FEtig,> |                                                       |
| VAL [sd] | ja wir sind fertig             |                                                       |
| VAL [nv] |                                | ((steht auf))                                         |
| VAL [a]  | 4-meta                         |                                                       |
| MAR [v]  |                                | (usser) riCARdo-                                      |
| MAR [sd] |                                | (ausser) Ricardo                                      |
| MAR [nv] |                                | ((steht auf))                                         |
| MAR [a]  |                                | 4-meta                                                |
| [nv]     | (---)                          |                                                       |

[68]

|          | ..351 [04:26.7]352 [04:26.8]353 [04:27.4]              | 354 [04:28.1]355 [04:28.2]                                                               |
|----------|--------------------------------------------------------|------------------------------------------------------------------------------------------|
| MAR [v]  | (xxx xxx xxx)                                          |                                                                                          |
| MAR [sd] | (xxx xxx xxx)                                          |                                                                                          |
| MAR [nv] |                                                        | ((steigt auf die Fensterbank und läuft zum Ausgang))                                     |
| MAR [a]  |                                                        |                                                                                          |
| NOR [v]  | also: (.) dO (mir) hän DA:S dA:s und dA:s;             |                                                                                          |
| NOR [sd] | also da (wir) haben das das und das                    |                                                                                          |
| NOR [nv] |                                                        | ((hält ihr Blatt zu VAL hin und zeigt jeweils vage auf Sackmesser, Schlafsack und Zelt)) |
| NOR [a]  | 1-th 2a-sch 1-th 2a-sac 1-th 2a-zel 4-meta 4-nonverbal |                                                                                          |

[69]

|          | 356 [04:30.0]357 [04:30.8*]                                           | 358 [04:31.3*]359 [04:31.7] | 360 [04:33.0]                                        |
|----------|-----------------------------------------------------------------------|-----------------------------|------------------------------------------------------|
| VAL [v]  | NÄ:I mir hÄn (-) mIr hän e SACKmässer e schlOOfsack und e zÄlt.       |                             |                                                      |
| VAL [sd] | nein wir haben wir haben ein Sackmesser einen Schlafsack und ein Zelt |                             |                                                      |
| VAL [nv] |                                                                       |                             | ((zeigt auf Sackmesser, Schlafsack und Zelt auf NORs |
| VAL [a]  | 1-th 2a-sac 1-th 2a-sch 1-th 2a-zel 4-meta                            |                             |                                                      |
| MAR [v]  | üä:h                                                                  |                             |                                                      |
| MAR [sd] | üä:h                                                                  |                             |                                                      |
| MAR [nv] | ((springt von der Fensterbank runter))                                |                             | ((läuft zurück zu                                    |

[70]

| ..       |         | 361 [04:33.6] | 362 [04:34.1] | 363 [04:34.1]        | 364 [04:34.5]               | 365 [04:34.8] | 366 [04:36.9] | 367 [04:38.1]      |
|----------|---------|---------------|---------------|----------------------|-----------------------------|---------------|---------------|--------------------|
| VAL [v]  |         |               |               |                      |                             |               |               | rIc Ä::HM (.) kUm, |
| VAL [sd] |         |               |               |                      |                             |               |               | Ric ähm komm       |
| VAL [nv] | Blatt)) |               |               | ((geht zum Ausgang)) |                             |               |               |                    |
| VAL [a]  |         |               |               |                      |                             |               |               | 4-meta 4-norm      |
| MAR [v]  |         |               |               | JÄ;                  |                             |               |               |                    |
| MAR [sd] |         |               |               | ja                   |                             |               |               |                    |
| MAR [nv] | NOR))   |               |               |                      | ((geht wieder zum Ausgang)) |               |               |                    |
| NOR [v]  |         |               | geNAU.        |                      |                             |               |               |                    |
| NOR [sd] |         |               | genau         |                      |                             |               |               |                    |
| NOR [nv] |         |               |               |                      |                             |               |               | ((steigt auf       |

[71]

| 368 [04:38.7] |                                        | 369 [04:40.2] | 370 [04:40.7]   | 371 [04:40.9]                        | 372 [04:41.6] |
|---------------|----------------------------------------|---------------|-----------------|--------------------------------------|---------------|
| RIC [v]       |                                        |               | <<lachend> hi,> |                                      |               |
| RIC [sd]      |                                        |               | hi              |                                      |               |
| NOR [v]       | NÄ:I wA(r)tet uf mI:,                  |               |                 |                                      |               |
| NOR [sd]      | nein wartet auf mich                   |               |                 |                                      |               |
| NOR [nv]      | Fensterbank und rennt zu VAL und MAR)) |               |                 | ((springt von Fensterbank herunter)) |               |
| NOR [a]       | 4-norm                                 |               |                 |                                      |               |
